# Supplementary material
Source: PubMed Central journal article supplement (PMC4164902)

# **An Automated Process for a Sequential Heterocycle/Multicomponent Reaction: Multistep Continuous Flow Synthesis of 5-(Thiazol-2-yl)-3,4-Dihydropyrimidin-2(*IH*)-ones**

*Nicholas Pagano, Ananda Herath, and Nicholas D. P. Cosford\**

Apoptosis and Cell Death Research & Conrad Prebys Center for Chemical Genomics, Sanford-Burnham Medical Research Institute, 10901 N. Torrey Pines Rd., La Jolla, CA 92037

Email: [ncosford@sanfordburnham.org](mailto:ncosford@sanfordburnham.org)

## **Content**

- A) Overview for the synthesis of thioamide **3**: **S2**
- B) Experimental procedures for the synthesis of thioamide **3** including characterization data: **S2-S3**
- C) Selected HPLC data for Table 1: **S4**
- D) Structures of  $\alpha$ -bromoketones **4b-4j**: **S5**
- E) General experimental procedure for the microfluidic synthesis of  $\beta$ -ketothiazoles **2** and characterization data for **2a-2j**: **S5-S7**
- F) Selected example of one-chip Biginelli flow synthesis: **S8**
- G) General experimental procedure for the microfluidic synthesis of DHPMs **1** and characterization data for DHPMs **1b-1i**: **S9-S11**
- H) NMR Spectra: **S12-S30**

All reactions were carried out using oven-dried glassware and conducted under a positive pressure of nitrogen unless otherwise specified. NMR spectra were recorded on a JEOL JNM-CS400 (400 MHz) spectrometer. With the exception of thioamide **3** ( $\text{CDCl}_3$ ), all NMR samples were prepared using  $\text{DMSO}-d_6$ . High resolution mass spectra were obtained on an Agilent mass spectrometer using ESI-TOF at the Scripps Research Institute Mass Spectrometry Laboratory. LC/MS analyses were carried out on a Shimadzu LC/MS 2010 Series LC System with a Kromasil 100 5 micron C18 column (50 x 2.1 mmID). Silica gel purifications were accomplished using a CombiFlash  $R_f$  system from Teledyne Isco using RediSep  $R_f$  pre-packed columns. All reagents as solvents were used as received from standard suppliers. Microfluidic experiments were conducted using a Syrris AFRICA<sup>®</sup> synthesis station.

### A) Overview for the synthesis of thioamide **3**

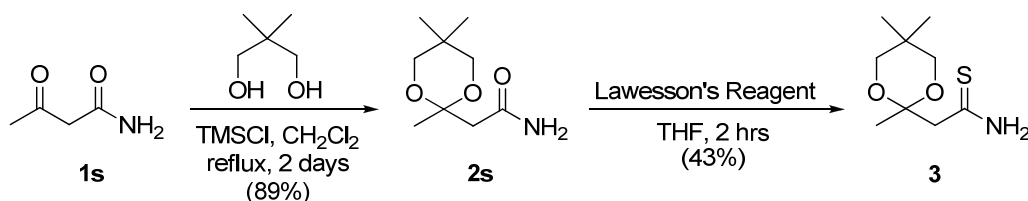

### B) Experimental procedures for the synthesis of thioamide **3** including characterization data

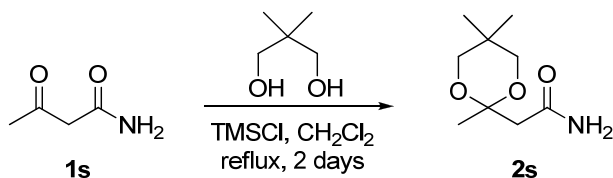

**Ketal-protected Amide 2s.** To a vacuum dried solid mixture of ketone **1s** (5.05 g, 50.0 mmol, 1 equiv) and neopentyl glycol (11.0 g, 110 mmol, 2.2 equiv) was added anhydrous  $\text{CH}_2\text{Cl}_2$  (200 mL) followed by chlorotrimethylsilane (28.0 mL, 220 mmol, 4.4 equiv). The resulting clear solution was heated to reflux for 2 days. The resulting cloudy reaction mixture was cooled to 0 °C, carefully quenched with portion-wise addition of saturated aqueous  $\text{NaHCO}_3$ , and the

resulting biphasic mixture separated. Then, the organic layer was washed with brine, dried using  $\text{Na}_2\text{SO}_4$ , and concentrated to dryness *in vacuo*. The resulting clear oil was loaded onto a pre-packed silica gel column (120 g) using  $\text{CH}_2\text{Cl}_2$  and chromatographed using  $\text{CH}_2\text{Cl}_2$ :MeOH (85 mL/min, 100%  $\text{CH}_2\text{Cl}_2$  for 5 min, then ramping to 20% MeOH over 20 min). Following concentration of product eluents, **2s** (8.35 g, 89%) was isolated as a clear oil which slowly became white crystals over time.  $^1\text{H}$  NMR consistent with literature reported spectrum.<sup>1</sup>

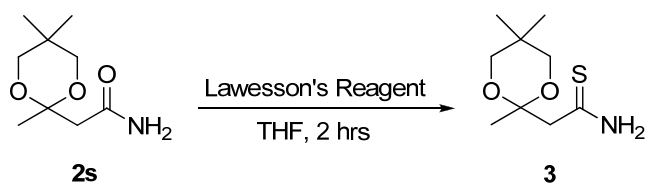

**Ketal-protected Thioamide 3.** A solution of **2s** (5.81 g, 31.1 mmol, 1 equiv) in anhydrous THF was prepared and cooled to 0 °C. Lawesson's reagent (6.91 g, 17.1 mmol, 0.55 equiv) was then added and the resulting yellow suspension was allowed to naturally warm to room temperature, stirring for a total of 2 hrs. The resulting yellow solution was concentrated *in vacuo* and re-dissolved in EtOAc. Then, the organic phase was washed with saturated aqueous  $\text{NaHCO}_3$  followed by brine, dried using  $\text{Na}_2\text{SO}_4$ , and concentrated to dryness *in vacuo*. The crude material was adsorbed onto silica gel, loaded onto a pre-packed silica gel column (120 g), and chromatographed using hexanes:EtOAc (85 mL/min, 0% EtOAc to 30% EtOAc over 60 min). Following concentration of product eluents, the resulting white solid still required further purification. Thus, the chromatographed material was treated with toluene (50 mL), cooled to -20 °C, and the resulting white precipitate collected to provide **3** (2.70 g, 43%) as white crystals. Mp 111-113 °C.  $^1\text{H}$  NMR (400 MHz,  $\text{CDCl}_3$ ):  $\delta$  (ppm) 8.25 (s, 1H), 7.85 (s, 1H), 3.63 (d,  $J = 11.0$  Hz, 2H), 3.44 (d,  $J = 11.0$  Hz, 2H), 3.16 (s, 2H), 1.46 (s, 3H), 1.06 (s, 3H), 0.84 (s, 3H).  $^{13}\text{C}$  NMR (100 MHz,  $\text{CDCl}_3$ ):  $\delta$  (ppm) 205.0, 98.2, 54.0, 30.1, 23.1, 22.4, 18.8. HRMS (ESI):  $m/z$  calcd for  $\text{C}_9\text{H}_{18}\text{NO}_2\text{S}$  ( $\text{M} + \text{H}$ )<sup>+</sup> 204.1053, found ( $\text{M} + \text{H}$ )<sup>+</sup> 204.1050.

Reference 1: For similar reaction conditions, see: Zamir, L. O.; Nguyen, C. *J. Labelled Compd. Radiopharm.* **1988**, 25, 1189-1196. For characterization data of **2s**, see: Paquette, L. A.; Efremov, I. *J. Am. Chem. Soc.* **2001**, 123, 4492-4501.

**C) Selected HPLC data for Table 1** – Separation conditions: Reverse-phase (C18) using an acetonitrile gradient of 10% to 95% over 4 min in water containing 0.05 % formic acid with a flow rate of 1.0 mL/min. Refer to page S2 for column information.

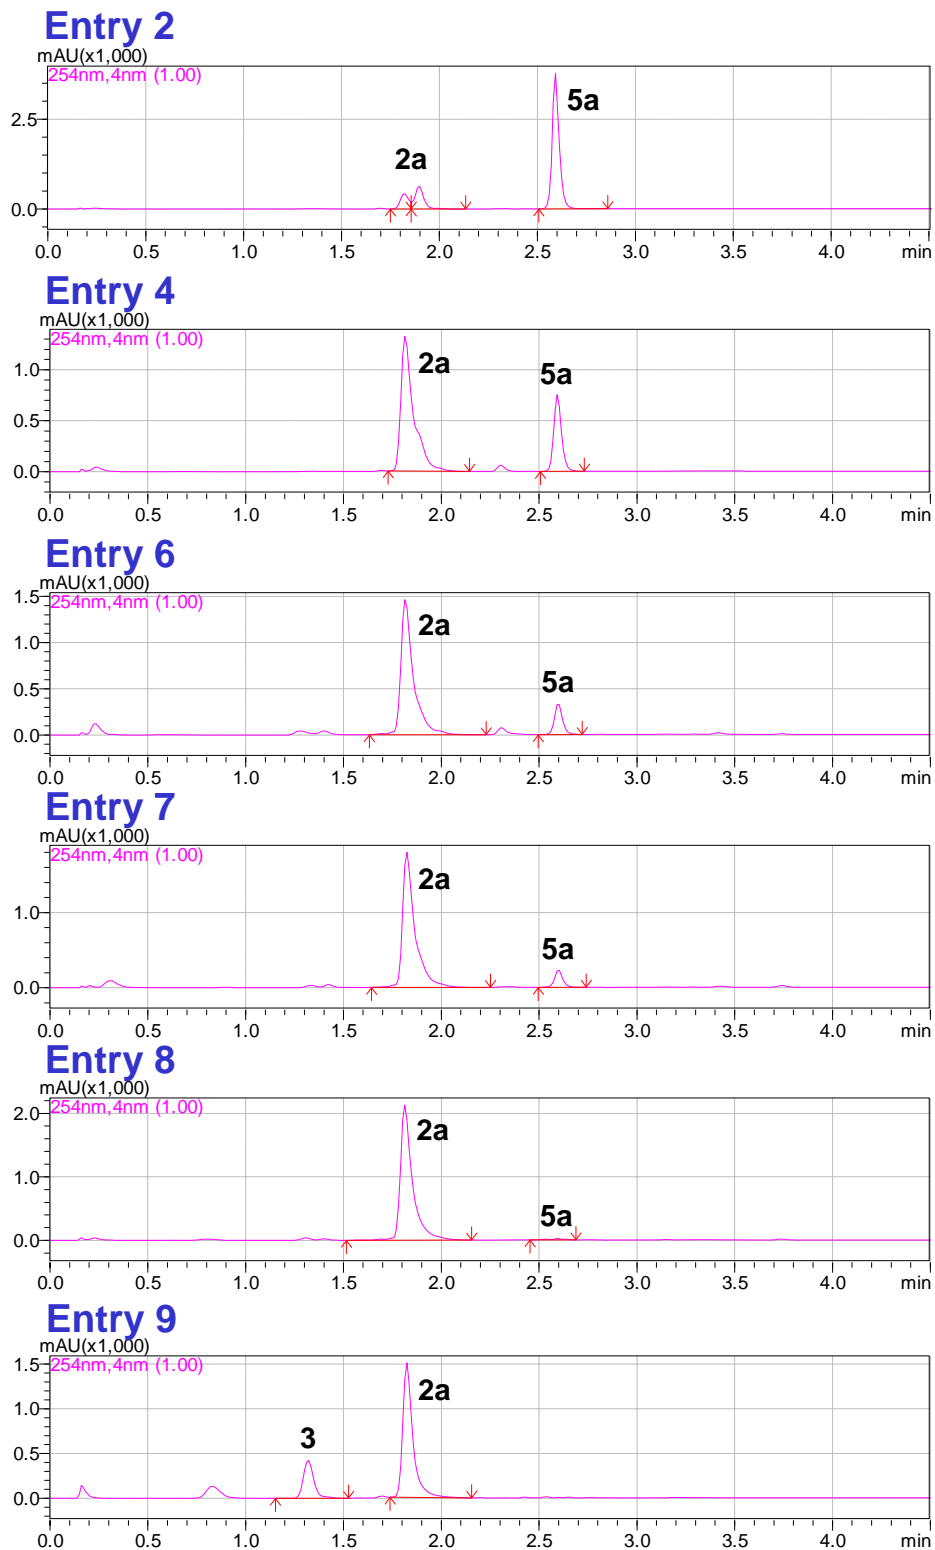

#### D) Structures of $\alpha$ -bromoketones 4b-4j

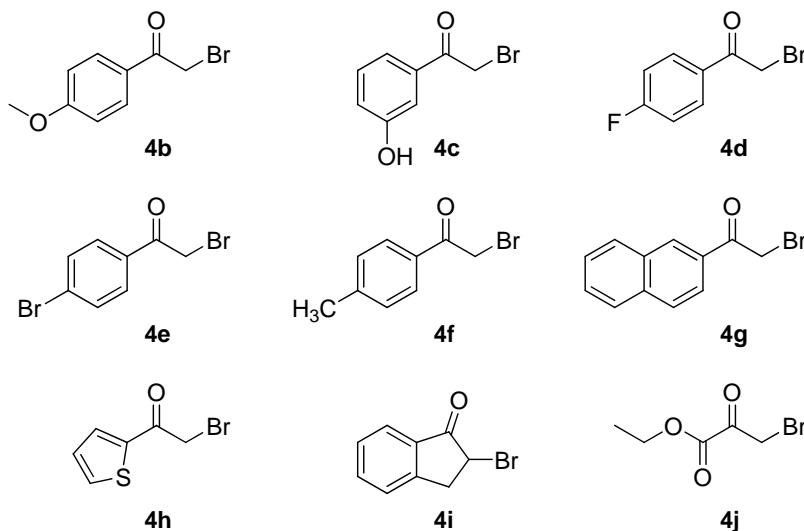

#### E) General experimental procedure for the microfluidic synthesis of $\beta$ -ketothiazoles 2 and characterization data for 2a-2j

**Synthesis of  $\beta$ -ketothiazoles 2:** All reactions were conducted in DMF under a positive pressure of nitrogen. Streams of the thioamide 3 (25  $\mu$ L/min, 0.5 M, DMF, 1 equiv) and a solution of  $\alpha$ -bromoketones 4 (25  $\mu$ L/min, 0.5 M, DMF, 1 equiv) containing 1.0 equiv of H<sub>2</sub>O were mixed in a 250  $\mu$ L glass reactor heated to 150  $^{\circ}$ C (5 min). After exiting the chip, the reaction flow was then collected (1000  $\mu$ L) after passing through the back pressure regulator. These reactions were carried out with a back pressure of 6.0 bar. Then, the crude reaction mixture was adsorbed onto silica gel, loaded onto a pre-packed silica gel column (12 g), and chromatographed using hexanes:EtOAc (30 mL/min, 100% hexanes for 5 min, then ramping to 40% EtOAc over 20 min).

**Ketothiazole 2a.** Title compound was isolated as a brown semi-solid (40 mg, 74%). <sup>1</sup>H NMR (400 MHz, DMSO-*d*<sub>6</sub>):  $\delta$  (ppm) 8.03 (s, 1H), 7.94 (m, 2H), 7.43 (m, 2H), 7.33 (m, 1H), 4.36 (s, 2H), 2.25 (s, 3H). <sup>13</sup>C NMR (100 MHz, DMSO-*d*<sub>6</sub>):  $\delta$  (ppm) 203.6, 162.4, 153.5, 134.1, 128.7, 127.9, 125.9, 114.9, 46.6, 29.7. HRMS (ESI): *m/z* calcd for C<sub>12</sub>H<sub>12</sub>NOS (M + H)<sup>+</sup> 218.0634, found (M + H)<sup>+</sup> 218.0645.

**Ketothiazole 2b.** Title compound was isolated as a brown semi-solid (56 mg, 90%). <sup>1</sup>H NMR (400 MHz, DMSO-*d*<sub>6</sub>): δ (ppm) 7.86 (s, 3H), 6.99 (d, *J* = 8.5 Hz, 2H), 4.34 (s, 2H), 3.79 (s, 3H), 2.25 (s, 3H). <sup>13</sup>C NMR (100 MHz, DMSO-*d*<sub>6</sub>): δ (ppm) 203.6, 162.2, 159.0, 153.4, 127.2, 126.9, 114.1, 112.8, 55.1, 46.6, 29.7. HRMS (ESI): *m/z* calcd for C<sub>13</sub>H<sub>14</sub>NO<sub>2</sub>S (M + H)<sup>+</sup> 248.0740, found (M + H)<sup>+</sup> 248.0743.

**Ketothiazole 2c.** Title compound was isolated as an orange semi-solid (53 mg, 91%). <sup>1</sup>H NMR (400 MHz, DMSO-*d*<sub>6</sub>): δ (ppm) 9.50 (s, 1H), 7.94 (s, 1H), 7.36-7.33 (m, 2H), 7.21 (t, *J* = 7.6 Hz, 1H), 6.73 (dd, *J* = 7.9, 1.8 Hz, 1H), 4.34 (s, 2H), 2.25 (s, 3H). <sup>13</sup>C NMR (100 MHz, DMSO-*d*<sub>6</sub>): δ (ppm) 203.6, 162.2, 157.7, 153.6, 135.3, 129.7, 116.7, 114.9, 114.7, 112.9, 46.6, 29.7. HRMS (ESI): *m/z* calcd for C<sub>12</sub>H<sub>12</sub>NO<sub>2</sub>S (M + H)<sup>+</sup> 234.0583, found (M + H)<sup>+</sup> 234.0588.

**Ketothiazole 2d.** Title compound was isolated as an orange semi-solid (42 mg, 71%). <sup>1</sup>H NMR (400 MHz, DMSO-*d*<sub>6</sub>): δ (ppm) 8.02 (s, 1H), 7.97 (m, 2H), 7.26 (m, 2H), 4.36 (m, 2H), 2.25 (s, 3H). <sup>13</sup>C NMR (100 MHz, DMSO-*d*<sub>6</sub>): δ (ppm) 203.6, 162.6, 161.8 (d<sub>C-F</sub>, *J* = 245.4 Hz), 152.5, 130.7, 127.9 (d<sub>C-F</sub>, *J* = 7.7 Hz), 115.6 (d<sub>C-F</sub>, *J* = 22.0 Hz), 114.7, 46.5, 29.7. HRMS (ESI): *m/z* calcd for C<sub>12</sub>H<sub>11</sub>FNOS (M + H)<sup>+</sup> 236.0540, found (M + H)<sup>+</sup> 236.0535.

**Ketothiazole 2e.** Title compound was isolated as a light yellow semi-solid (52 mg, 70%). <sup>1</sup>H NMR (400 MHz, DMSO-*d*<sub>6</sub>): δ (ppm) 8.12 (s, 1H), 7.89 (m, 2H), 7.63 (m, 2H), 4.36 (s, 2H), 2.25 (s, 3H). <sup>13</sup>C NMR (100 MHz, DMSO-*d*<sub>6</sub>): δ (ppm) 203.6, 162.8, 152.2, 133.3, 131.7, 127.9, 121.0, 115.7, 40.1, 29.7. HRMS (ESI): *m/z* calcd for C<sub>12</sub>H<sub>11</sub>BrNOS (M + H)<sup>+</sup> 295.9739, found (M + H)<sup>+</sup> 295.9735.

**Ketothiazole 2f.** Title compound was isolated as a light yellow semi-solid (47 mg, 81%). <sup>1</sup>H NMR (400 MHz, DMSO-*d*<sub>6</sub>): δ (ppm) 7.94 (s, 1H), 7.81 (d, *J* = 8.2 Hz, 2H), 7.22 (d, *J* = 7.8 Hz, 2H), 4.33 (s, 2H), 2.31 (s, 3H), 2.23 (s, 3H). <sup>13</sup>C NMR (100 MHz, DMSO-*d*<sub>6</sub>): δ (ppm) 203.6, 162.2, 153.6, 137.2, 131.4, 129.3, 125.8, 114.0, 46.6, 29.7, 20.8. HRMS (ESI): *m/z* calcd for C<sub>13</sub>H<sub>14</sub>NOS (M + H)<sup>+</sup> 232.0791, found (M + H)<sup>+</sup> 232.0793.

**Ketothiazole 2g.** Title compound was isolated as a beige semi-solid (56 mg, 84%). <sup>1</sup>H NMR (400 MHz, DMSO-*d*<sub>6</sub>): δ (ppm) 8.51 (s, 1H), 8.18 (s, 1H), 8.09 (dd, *J* = 8.2, 1.8 Hz, 1H), 8.00-7.91 (m, 3H), 7.54-7.50 (m, 2H), 4.41 (s, 2H), 2.28 (s, 3H). <sup>13</sup>C NMR (100 MHz, DMSO-*d*<sub>6</sub>): δ (ppm) 203.6, 162.7, 153.4, 133.2, 132.6, 131.5, 128.3, 128.2, 127.6, 126.5, 126.2, 124.5, 124.2, 115.5, 46.6, 29.7. HRMS (ESI): *m/z* calcd for C<sub>16</sub>H<sub>14</sub>NOS (M + H)<sup>+</sup> 268.0791, found (M + H)<sup>+</sup> 268.0801.

**Ketothiazole 2h.** Title compound was isolated as a brown semi-solid (42 mg, 75%). <sup>1</sup>H NMR (400 MHz, DMSO-*d*<sub>6</sub>): δ (ppm) 7.87 (s, 1H), 7.54 (dd, *J* = 3.7, 0.9 Hz, 1H), 7.50 (dd, *J* = 5.0, 0.9 Hz, 1H), 7.10 (dd, *J* = 5.0, 3.7 Hz, 1H), 4.35 (s, 2H), 2.24 (s, 3H). <sup>13</sup>C NMR (100 MHz, DMSO-*d*<sub>6</sub>): δ (ppm) 203.5, 162.7, 148.2, 138.0, 128.0, 125.7, 124.0, 113.3, 46.3, 29.7. HRMS (ESI): *m/z* calcd for C<sub>10</sub>H<sub>10</sub>NOS<sub>2</sub> (M + H)<sup>+</sup> 224.0198, found (M + H)<sup>+</sup> 224.0206.

**Ketothiazole 2i.** Title compound was isolated as an orange semi-solid (28 mg, 49%). <sup>1</sup>H NMR (400 MHz, DMSO-*d*<sub>6</sub>): δ (ppm) 7.63 (d, *J* = 7.3 Hz, 1H), 7.57 (d, *J* = 7.3 Hz, 1H), 7.37 (t, *J* = 6.7 Hz, 1H), 7.26 (td, *J* = 7.3, 1.2 Hz, 1H), 4.39 (s, 2H), 3.93 (s, 2H), 2.25 (s, 3H). <sup>13</sup>C NMR (100 MHz, DMSO-*d*<sub>6</sub>): δ (ppm) 203.6, 166.5, 160.2, 146.0, 137.1, 136.6, 126.9, 125.3, 125.2, 118.2, 47.3, 32.3, 29.6. HRMS (ESI): *m/z* calcd for C<sub>13</sub>H<sub>12</sub>NOS (M + H)<sup>+</sup> 230.0634, found (M + H)<sup>+</sup> 230.0636.

**Ketothiazole 2j.** Title compound was isolated as a bright yellow semi-solid (27 mg, 51%). <sup>1</sup>H NMR (400 MHz, DMSO-*d*<sub>6</sub>): δ (ppm) 8.45 (s, 1H), 4.37 (s, 2H), 4.29 (q, *J* = 7.3 Hz, 2H), 2.24 (s, 3H), 1.29 (t, *J* = 7.3 Hz, 3H). <sup>13</sup>C NMR (100 MHz, DMSO-*d*<sub>6</sub>): δ (ppm) 203.5, 163.3, 160.8, 145.2, 129.8, 60.6, 46.2, 29.7, 14.2. HRMS (ESI): *m/z* calcd for C<sub>9</sub>H<sub>12</sub>NO<sub>3</sub>S (M + H)<sup>+</sup> 214.0532, found (M + H)<sup>+</sup> 214.0531.

## F) Selected example of one-chip Biginelli flow synthesis

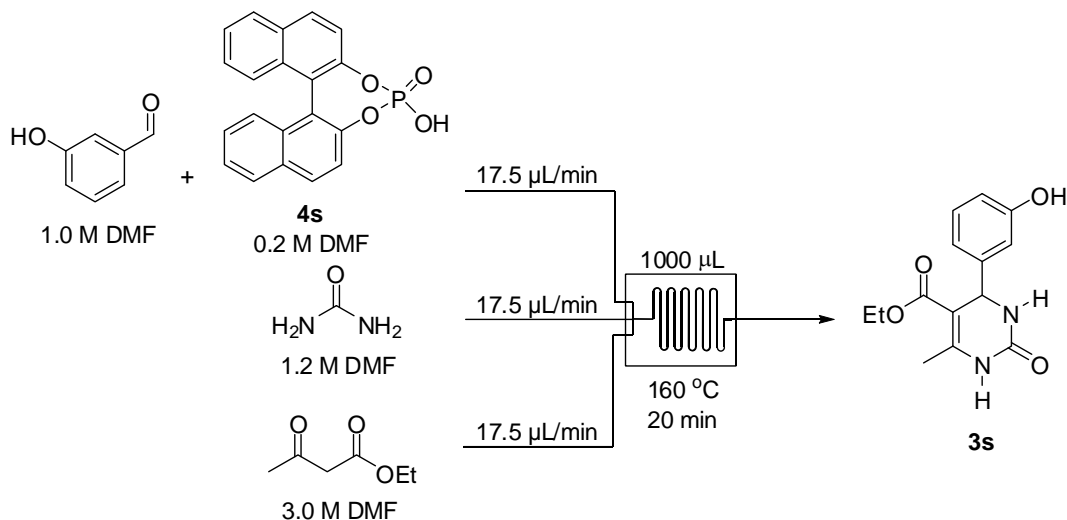

**Synthesis of DHPM 3s:** Reaction was conducted in DMF under a positive pressure of nitrogen. Streams of 3-hydroxybenzaldehyde (17.5 µL/min, 1.0 M, DMF, 1 equiv) containing 0.2 equiv of acid **4s**,<sup>2</sup> urea (17.5 µL/min, 1.2 M, DMF, 1.2 equiv), and ethyl acetoacetate (17.5 µL/min, 3.0 M, DMF, 3 equiv) were mixed in a 1000 µL glass reactor heated to 160 °C (20 min). After exiting the chip, the reaction flow was then collected (1500 µL) after passing through the back pressure regulator. The reaction was carried out with a back pressure of 6.0 bar. Then, the crude reaction mixture was adsorbed onto silica gel, loaded onto a pre-packed silica gel column (12 g), and chromatographed using hexanes:EtOAc (30 mL/min, 10% EtOAc to 100% EtOAc over 20 min). Following concentration of product eluents, the title compound was isolated as a white solid (89 mg, 64%). <sup>1</sup>H NMR is consistent with literature reported spectra.

It is important to note that in the absence of acid **4s**, this reaction and others of its kind remain incomplete.

Reference 2: For the use of phosphoric acids in the Biginelli reaction, see: Chen, X. H.; Xu, X. Y.; Liu, H.; Cun, L. F.; Gong, L. Z. *J. Am. Chem. Soc.* **2006**, *128*, 14802-14803.



## G) General experimental procedure for the microfluidic synthesis of DHPMs 1 and characterization data for DHPMs 1b-1i

**Synthesis of DHPMs 1:** All reactions were conducted in DMF under a positive pressure of nitrogen. Streams of the thioamide **3** (32.5  $\mu\text{L}/\text{min}$ , 0.75 M, DMF, 1 equiv) and a solution of  $\alpha$ -bromoketones **4** (32.5  $\mu\text{L}/\text{min}$ , 0.75 M, DMF, 1 equiv) were mixed in a 250  $\mu\text{L}$  glass reactor heated to 150  $^{\circ}\text{C}$  (3.75 min). After exiting the chip, the combined flow (65.0  $\mu\text{L}/\text{min}$ ) was introduced to a single stream (32.5  $\mu\text{L}/\text{min}$ , 0.9 M, DMF, 1.2 equiv) of 3-hydroxybenzaldehyde **6** and urea **7** in a 1000  $\mu\text{L}$  glass reactor heated to 200  $^{\circ}\text{C}$  (10 min). The reaction flow was then collected (1250  $\mu\text{L}$ ) after passing through the back pressure regulator. These reactions were carried out with a back pressure of 6.0 bar. Then, the crude reaction mixtures were adsorbed onto silica gel, loaded onto a pre-packed silica gel column (12 g), and chromatographed using hexanes:EtOAc (30 mL/min, 10% EtOAc to 100% EtOAc over 20 min).

**DHPM 1b.** Title compound was isolated as a light yellow semi-solid (52 mg, 46%).  $^1\text{H}$  NMR (400 MHz,  $\text{DMSO-}d_6$ ):  $\delta$  (ppm) 9.36 (s, 1H), 9.02 (d,  $J = 1.8$  Hz, 1H), 7.93-7.91 (m, 3H), 7.69 (m, 1H), 7.43 (m, 2H), 7.32 (m, 1H), 7.08 (t,  $J = 7.8$  Hz, 1H), 6.80 (m, 1H), 6.78 (m, 1H), 6.60 (m, 1H), 5.44 (d,  $J = 3.2$  Hz, 1H), 2.37 (s, 3H).  $^{13}\text{C}$  NMR (100 MHz,  $\text{DMSO-}d_6$ ):  $\delta$  (ppm) 164.5, 157.4, 153.2, 152.5, 145.4, 137.8, 134.2, 129.3, 128.7, 127.9, 126.0, 117.5, 114.4, 113.5, 111.7, 104.0, 56.6, 17.9. HRMS (ESI):  $m/z$  calcd for  $\text{C}_{20}\text{H}_{18}\text{N}_3\text{O}_2\text{S}$  ( $\text{M} + \text{H}$ ) $^+$  364.1114, found ( $\text{M} + \text{H}$ ) $^+$  364.1128.

**DHPM 1c.** Title compound was isolated as a light yellow semi-solid (53 mg, 43%).  $^1\text{H}$  NMR (400 MHz,  $\text{DMSO-}d_6$ ):  $\delta$  (ppm) 9.34 (s, 1H), 8.99 (d,  $J = 1.8$  Hz, 1H), 7.84-7.82 (m, 2H), 7.72 (s, 1H), 7.67 (m, 1H), 7.07 (t,  $J = 7.8$  Hz, 1H), 6.97-6.95 (m, 2H), 6.78 (m, 1H), 6.76 (m, 1H), 6.59 (ddd,  $J = 8.2, 2.3, 0.9$  Hz, 1H), 5.42 (d,  $J = 3.7$  Hz, 1H), 3.76 (s, 3H), 2.34 (s, 3H).  $^{13}\text{C}$  NMR (100 MHz,  $\text{DMSO-}d_6$ ):  $\delta$  (ppm) 164.2, 159.1, 157.4, 153.1, 152.5, 145.4, 137.6, 129.3, 127.3, 127.1, 117.5, 114.4, 114.1, 113.5, 109.7, 104.1, 56.6, 55.1, 17.9. HRMS (ESI):  $m/z$  calcd for  $\text{C}_{21}\text{H}_{20}\text{N}_3\text{O}_3\text{S}$  ( $\text{M} + \text{H}$ ) $^+$  394.1220, found ( $\text{M} + \text{H}$ ) $^+$  394.1228.

**DHPM 1d.** Title compound was isolated as a yellow semi-solid (54 mg, 45%). <sup>1</sup>H NMR (400 MHz, DMSO-*d*<sub>6</sub>): δ (ppm) 9.48 (s, 1H), 9.35 (s, 1H), 9.01 (d, *J* = 1.8 Hz, 1H), 7.81 (s, 1H), 7.70 (m, 1H), 7.35-7.32 (m, 2H), 7.20 (t, *J* = 7.8 Hz, 1H), 7.08 (t, *J* = 7.8 Hz, 1H), 6.80 (d, 7.8 Hz, 1H), 6.76 (m, 1H), 6.72 (m, 1H), 6.60 (m, 1H), 5.45 (d, *J* = 3.2 Hz, 1H), 2.36 (s, 3H). <sup>13</sup>C NMR (100 MHz, DMSO-*d*<sub>6</sub>): δ (ppm) 164.2, 157.6, 157.4, 153.3, 152.5, 145.4, 137.7, 135.4, 129.7, 129.3, 117.5, 116.8, 114.9, 114.3, 113.4, 112.9, 111.6, 104.1, 56.5, 17.9. HRMS (ESI): *m/z* calcd for C<sub>20</sub>H<sub>18</sub>N<sub>3</sub>O<sub>3</sub>S (M + H)<sup>+</sup> 380.1063, found (M + H)<sup>+</sup> 380.1066.

**DHPM 1e.** Title compound was isolated as a light yellow semi-solid (46 mg, 39%). <sup>1</sup>H NMR (400 MHz, DMSO-*d*<sub>6</sub>): δ (ppm) 9.35 (s, 1H), 9.02 (d, *J* = 1.8 Hz, 1H), 7.96-7.93 (m, 2H), 7.88 (s, 1H), 7.69 (m, 1H), 7.24 (m, 2H), 7.07 (t, *J* = 7.8 Hz, 1H), 6.79-6.75 (m, 2H), 6.59 (ddd, *J* = 8.2, 2.3, 0.9 Hz, 1H), 5.42 (d, *J* = 3.2 Hz, 1H), 2.35 (s, 3H). <sup>13</sup>C NMR (100 MHz, DMSO-*d*<sub>6</sub>): δ (ppm) 164.6, 161.8 (d<sub>C-F</sub>, *J* = 244.4 Hz), 157.4, 152.4, 152.2, 145.4, 138.0, 130.8, 129.4, 127.9, 117.5, 115.6 (d<sub>C-F</sub>, *J* = 22.0 Hz), 114.4, 113.5, 111.4, 103.9, 56.6, 17.9. HRMS (ESI): *m/z* calcd for C<sub>20</sub>H<sub>17</sub>FN<sub>3</sub>O<sub>2</sub>S (M + H)<sup>+</sup> 382.1020, found (M + H)<sup>+</sup> 382.1022.

**DHPM 1f.** Title compound was isolated as a light yellow semi-solid (59 mg, 43%). <sup>1</sup>H NMR (400 MHz, DMSO-*d*<sub>6</sub>): δ (ppm) 9.36 (s, 1H), 9.04 (d, *J* = 1.8 Hz, 1H), 7.98 (s, 1H), 7.88 (m, 2H), 7.71 (m, 1H), 7.62 (m, 2H), 7.08 (t, *J* = 8.0 Hz, 1H), 6.79 (d, *J* = 7.8 Hz, 1H), 6.76 (s, 1H), 6.60 (m, 1H), 5.43 (d, *J* = 3.2 Hz, 1H), 2.36 (s, 3H). <sup>13</sup>C NMR (100 MHz, DMSO-*d*<sub>6</sub>): δ (ppm) 164.7, 157.4, 152.4, 152.0, 145.3, 138.1, 133.4, 131.7, 129.3, 128.0, 121.0, 117.5, 114.4, 113.5, 112.5, 103.9, 56.6, 17.9. HRMS (ESI): *m/z* calcd for C<sub>20</sub>H<sub>17</sub>BrN<sub>3</sub>O<sub>2</sub>S (M + H)<sup>+</sup> 442.0219, found (M + H)<sup>+</sup> 442.0220.

**DHPM 1g.** Title compound was isolated as a light yellow semi-solid (52 mg, 44%). <sup>1</sup>H NMR (400 MHz, DMSO-*d*<sub>6</sub>): δ (ppm) 9.35 (s, 1H), 9.00 (d, *J* = 1.8 Hz, 1H), 7.80 (s, 1H), 7.80-7.78 (m, 2H), 7.67 (m, 1H), 7.21 (d, *J* = 7.8 Hz, 2H), 7.06 (t, *J* = 7.8 Hz, 1H), 6.79-6.75 (m, 2H), 6.59 (ddd, *J* = 7.8, 2.3, 0.9 Hz, 1H), 5.42 (d, *J* = 3.2 Hz, 1H), 2.35 (s, 3H), 2.30 (s, 3H). <sup>13</sup>C NMR (100 MHz, DMSO-*d*<sub>6</sub>): δ (ppm) 164.3, 157.4, 153.3, 152.5, 145.4, 137.7, 137.2, 131.5, 129.3, 129.3, 125.9, 117.5, 114.4, 113.5, 110.8, 104.1, 56.6, 20.8, 17.9. HRMS (ESI): *m/z* calcd for C<sub>21</sub>H<sub>20</sub>N<sub>3</sub>O<sub>2</sub>S (M + H)<sup>+</sup> 378.1271, found (M + H)<sup>+</sup> 378.1281.

**DHPM 1h.** Title compound was isolated as a light yellow semi-solid (56 mg, 43%). <sup>1</sup>H NMR (400 MHz, DMSO-*d*<sub>6</sub>): δ (ppm) 9.38 (s, 1H), 9.05 (d, *J* = 1.8 Hz, 1H), 8.46 (s, 1H), 8.08-8.06 (m, 2H), 7.99-7.90 (m, 3H), 7.72 (m, 1H), 7.52 (m, 2H), 7.10 (t, *J* = 7.8 Hz, 2H), 6.85 (d, *J* = 7.8 Hz, 1H), 6.82 (m, 1H), 6.61 (m, 1H), 5.50 (d, *J* = 3.2 Hz, 1H), 2.41 (s, 3H). <sup>13</sup>C NMR (100 MHz, DMSO-*d*<sub>6</sub>): δ (ppm) 164.6, 157.4, 153.1, 152.4, 145.5, 137.9, 133.1, 132.6, 131.7, 129.4, 128.3, 128.2, 127.6, 126.5, 126.1, 124.6, 124.2, 117.5, 114.4, 113.6, 112.4, 104.1, 56.7, 18.0. HRMS (ESI): *m/z* calcd for C<sub>24</sub>H<sub>20</sub>N<sub>3</sub>O<sub>2</sub>S (M + H)<sup>+</sup> 414.1271, found (M + H)<sup>+</sup> 414.1290.

**DHPM 1i.** Title compound was isolated as a brown semi-solid (52 mg, 45%). <sup>1</sup>H NMR (400 MHz, DMSO-*d*<sub>6</sub>): δ (ppm) 9.35 (s, 1H), 9.05 (d, *J* = 1.8 Hz, 1H), 7.74 (s, 1H), 7.69 (m, 1H), 7.52-7.49 (m, 2H), 7.09 (dd, *J* = 5.3, 3.4 Hz, 1H), 7.07 (t, *J* = 7.8 Hz, 1H), 6.80 (d, *J* = 7.8 Hz, 1H), 6.77 (m, 1H), 6.60 (m, 1H), 5.41 (d, *J* = 3.7 Hz, 1H), 2.33 (s, 3H). <sup>13</sup>C NMR (100 MHz, DMSO-*d*<sub>6</sub>): δ (ppm) 164.4, 157.4, 152.4, 147.9, 145.4, 138.2, 138.1, 129.3, 128.0, 125.8, 123.9, 117.6, 114.4, 113.5, 110.0, 103.8, 56.5, 17.9. HRMS (ESI): *m/z* calcd for C<sub>18</sub>H<sub>16</sub>N<sub>3</sub>O<sub>2</sub>S<sub>2</sub> (M + H)<sup>+</sup> 370.0678, found (M + H)<sup>+</sup> 370.0689.

## H) NMR Spectra

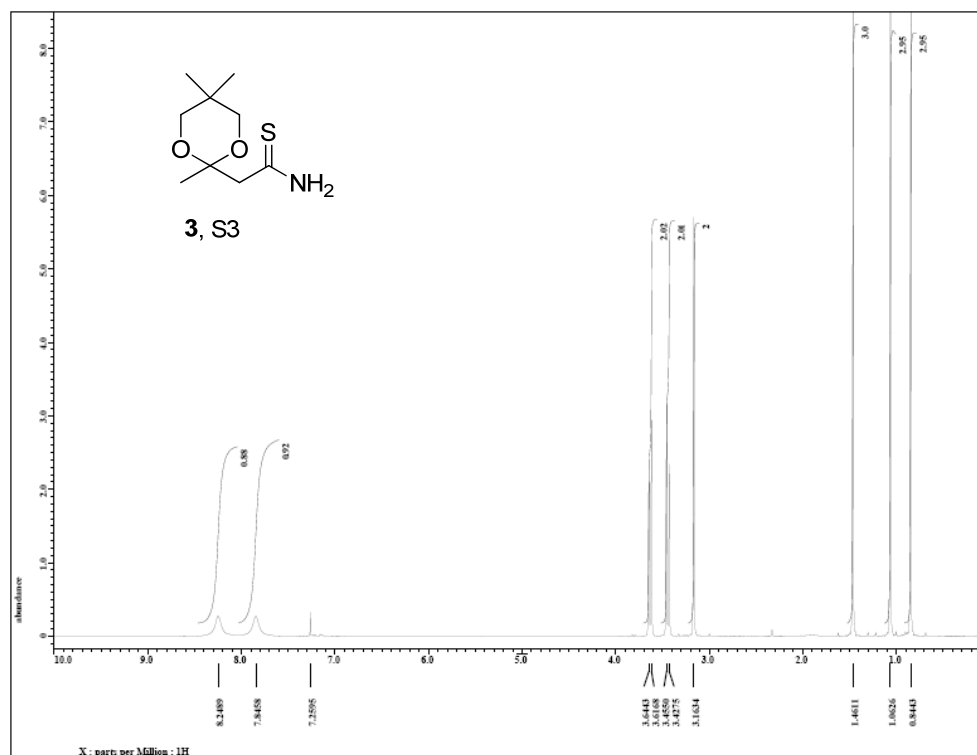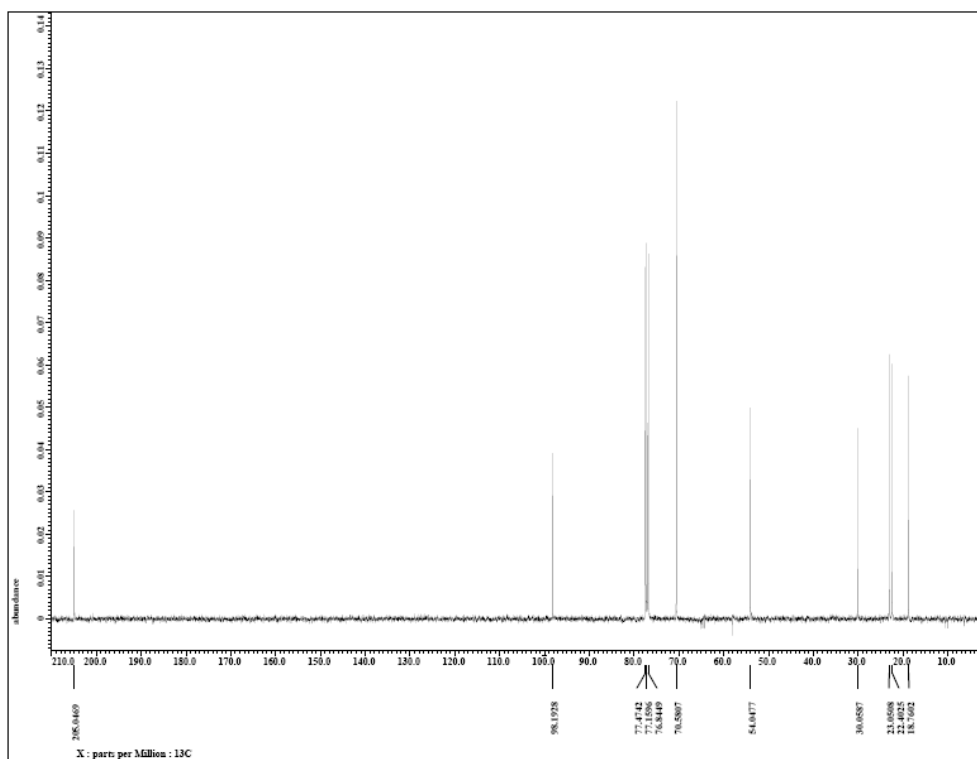

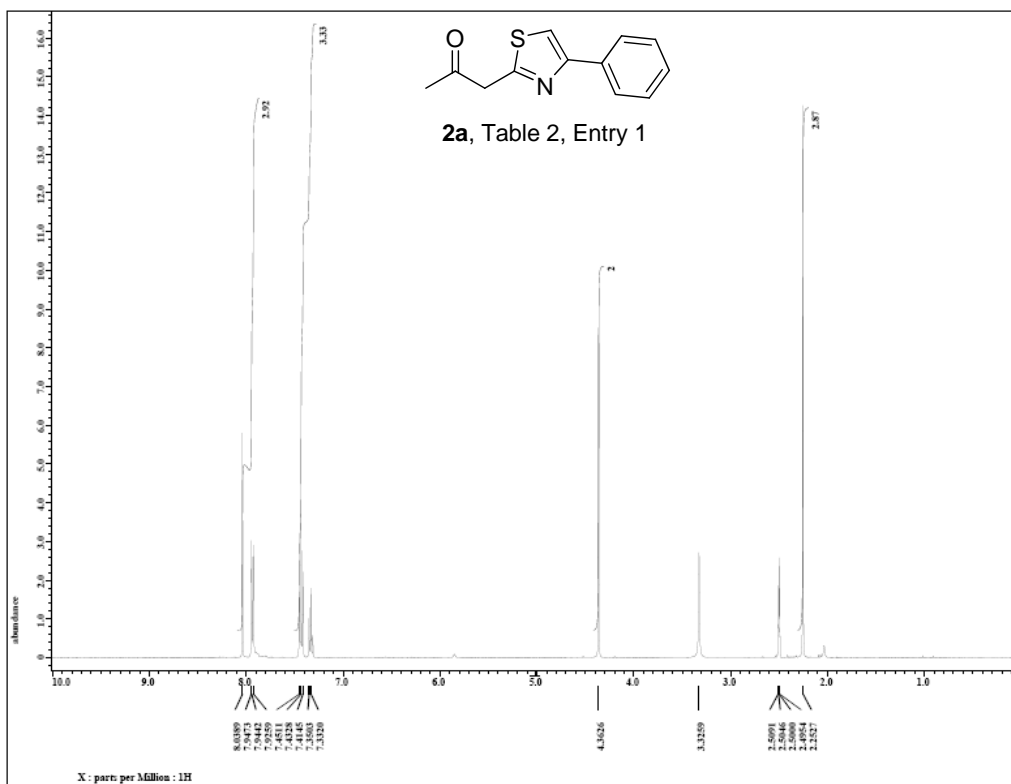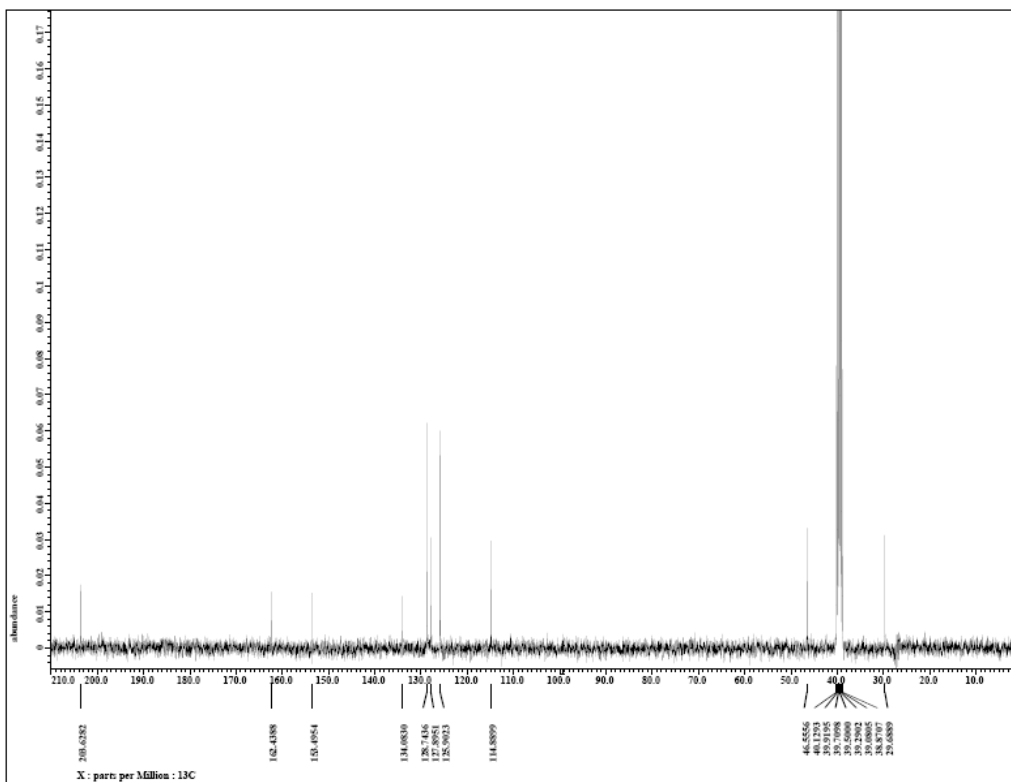

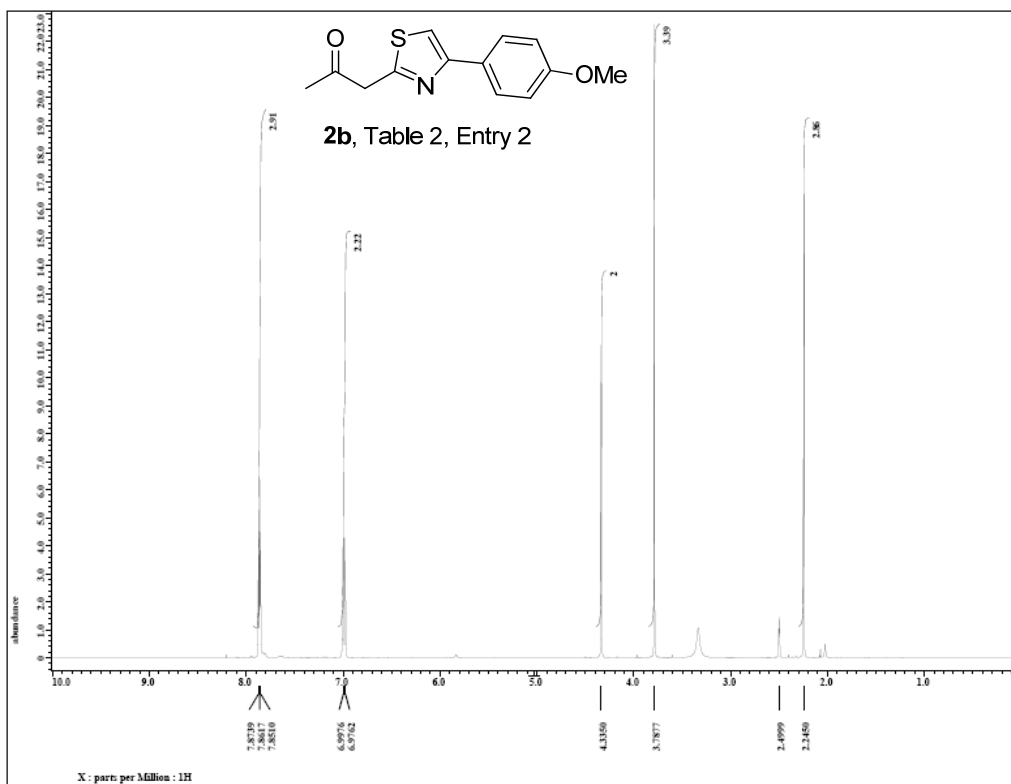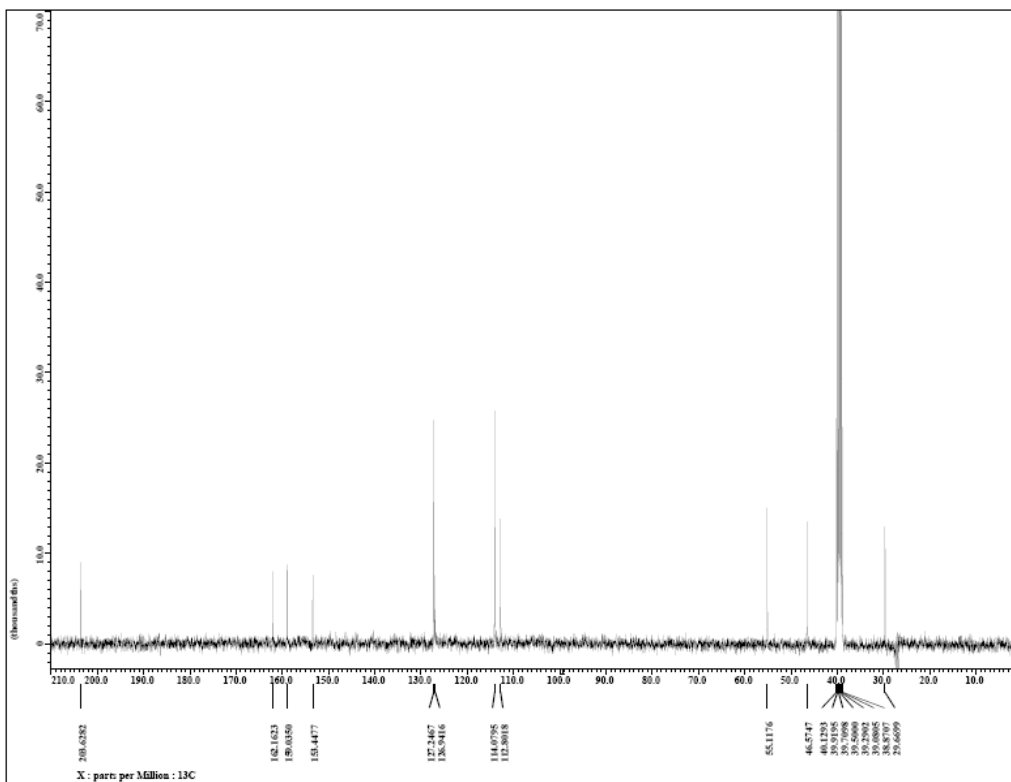

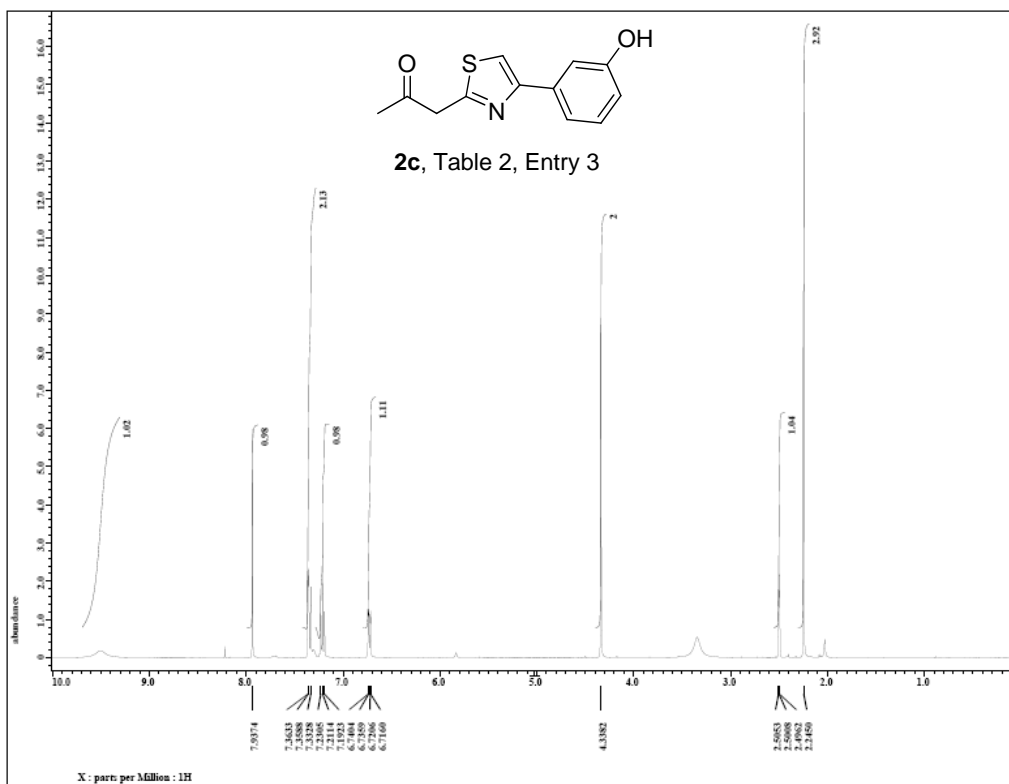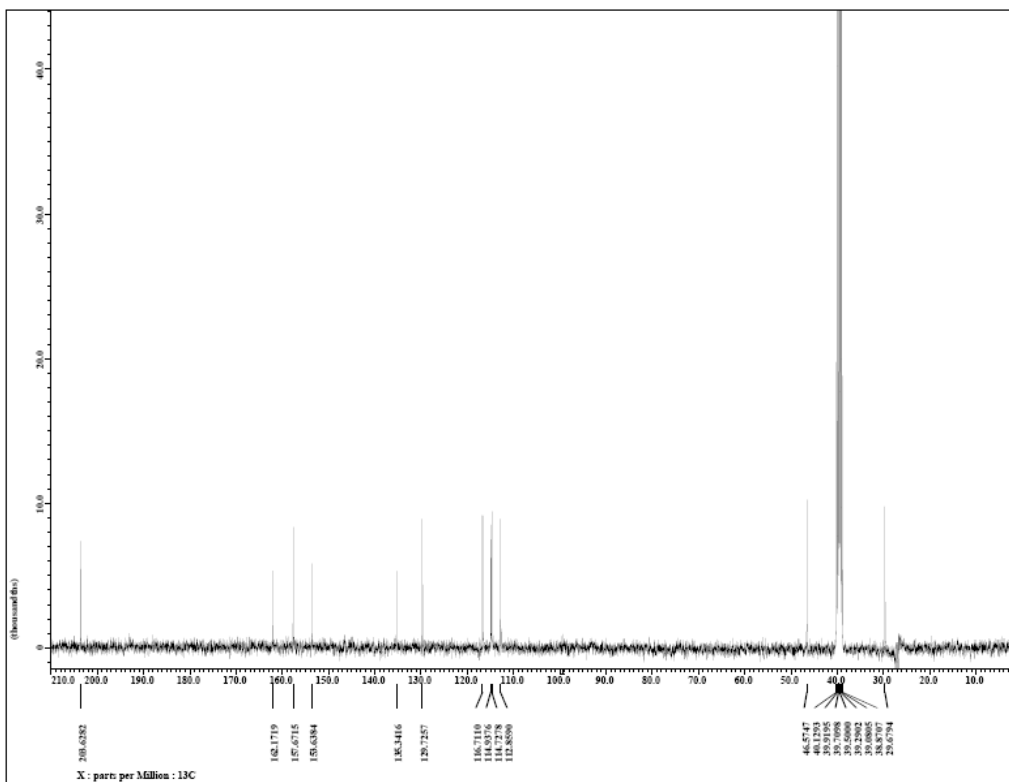

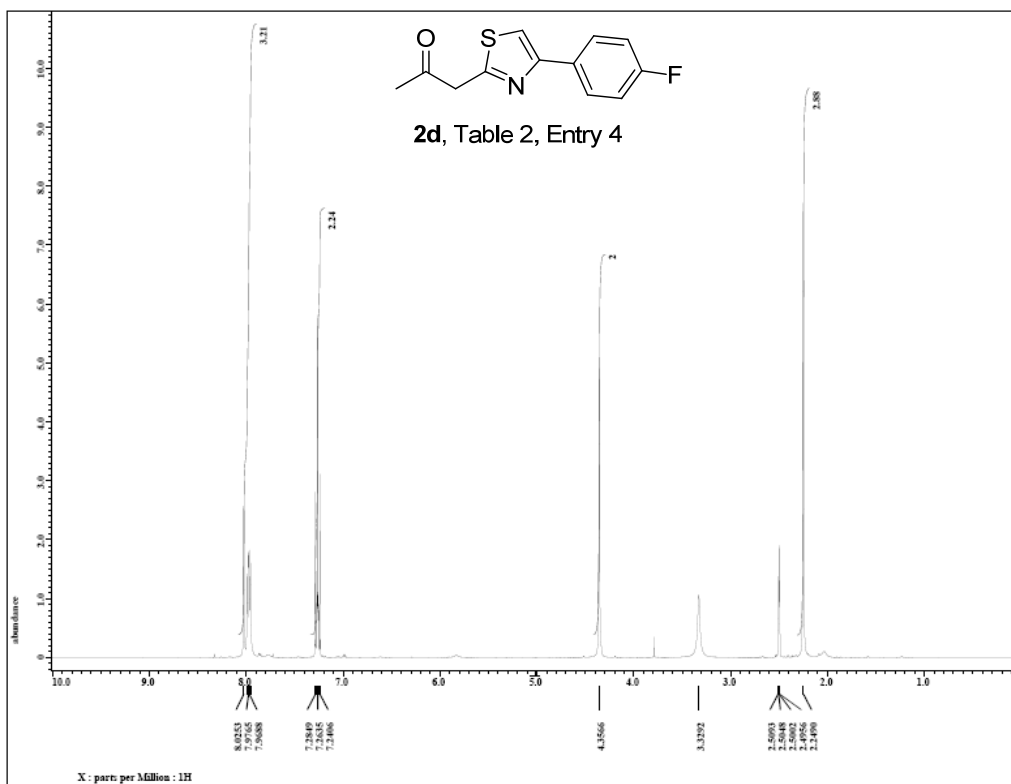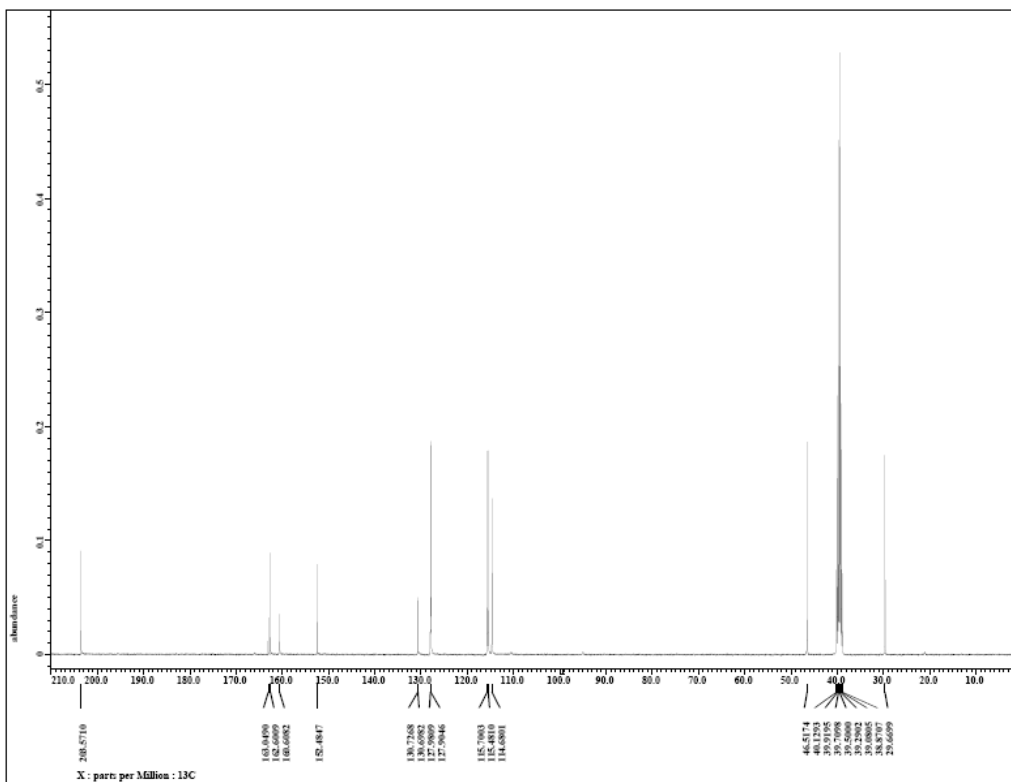



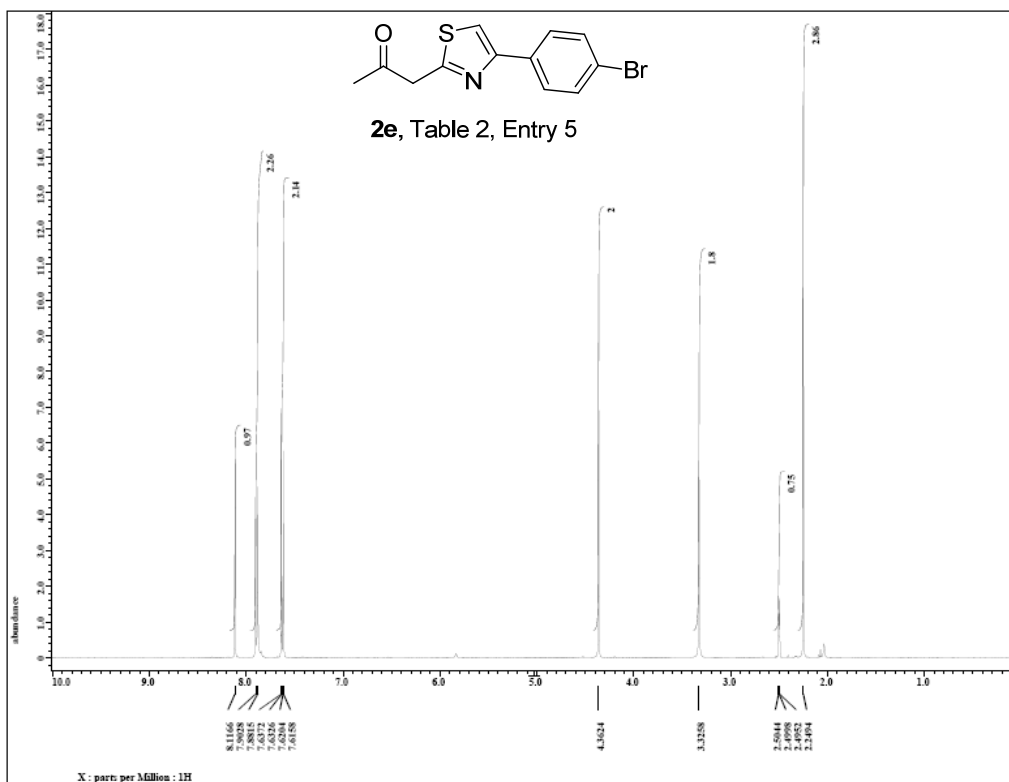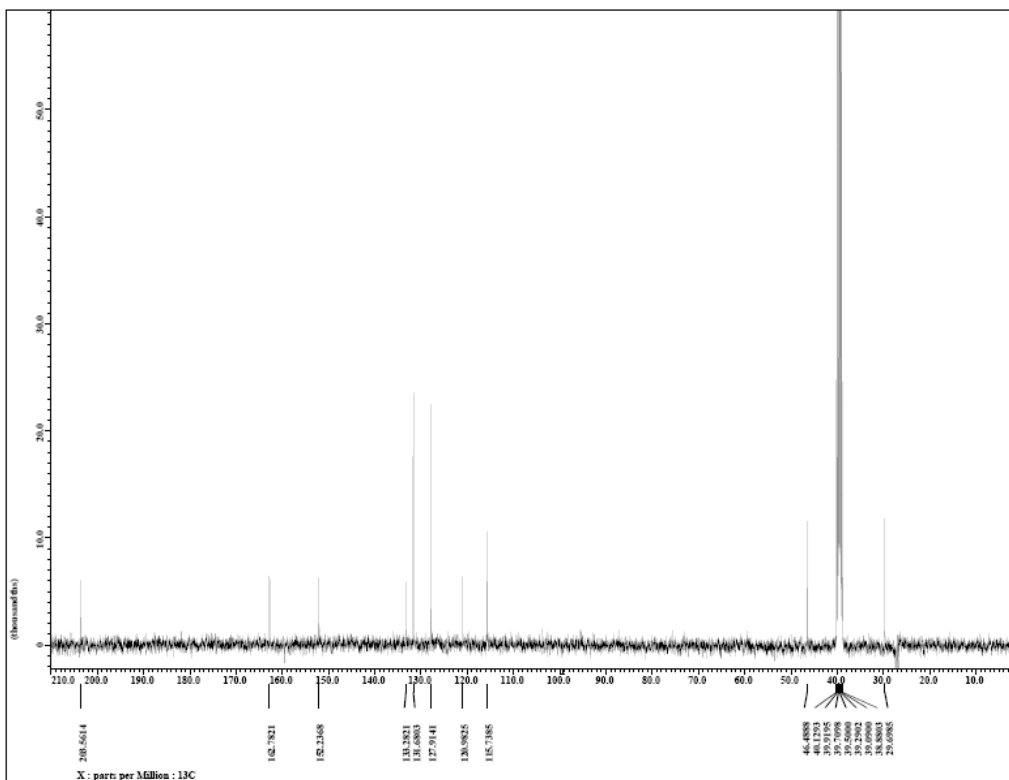

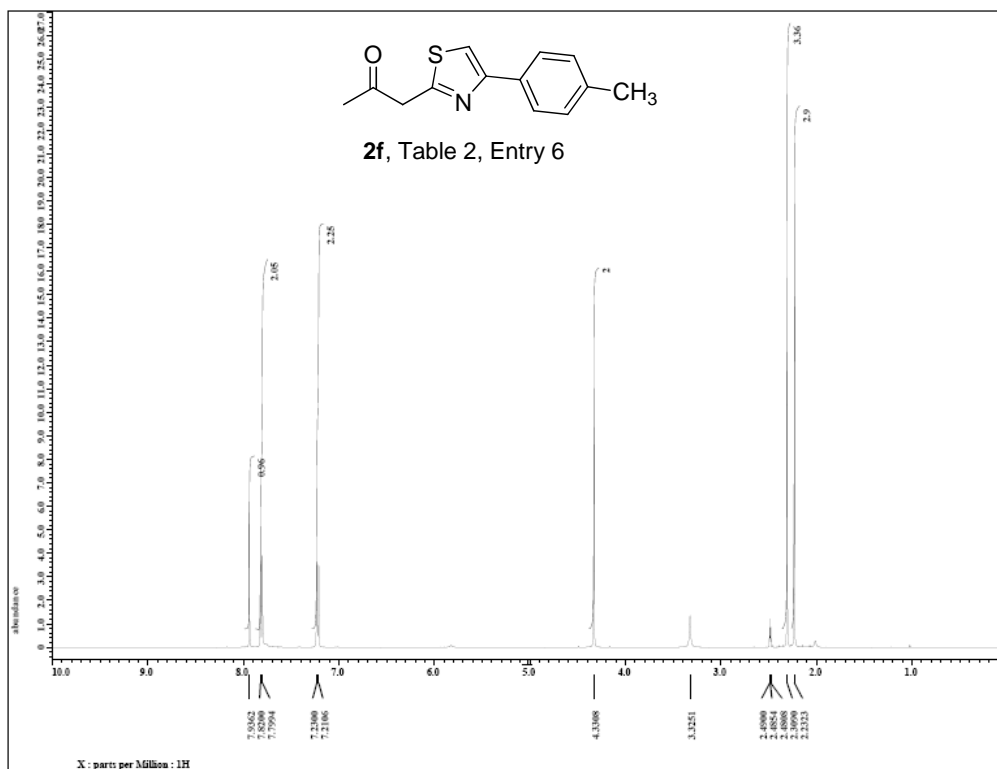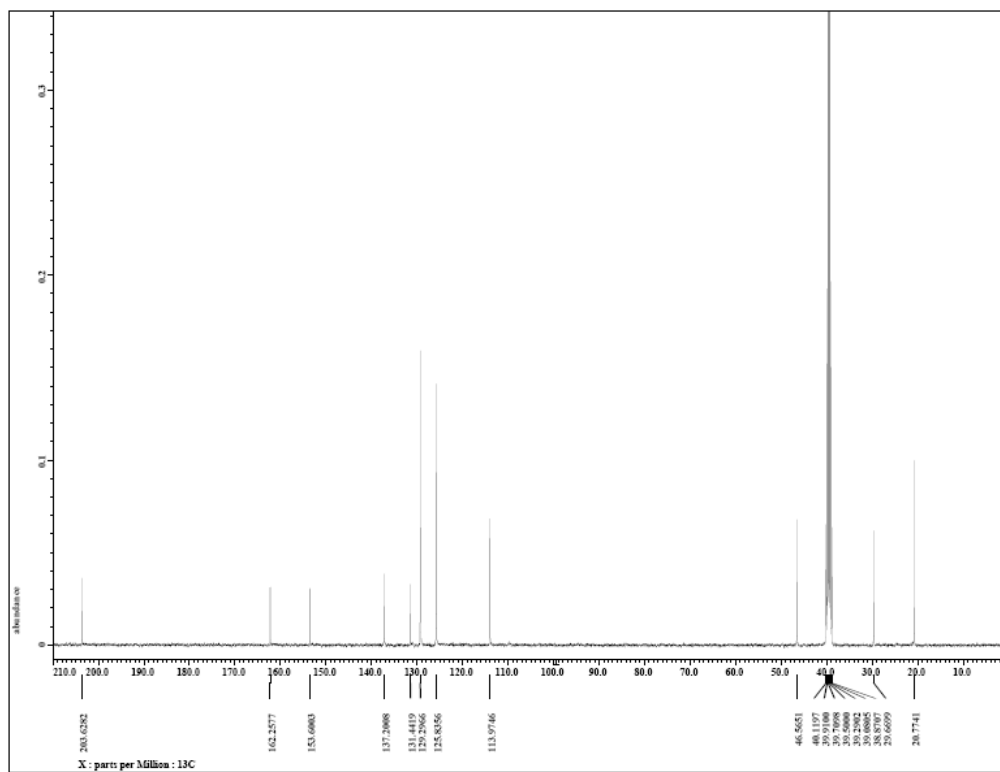

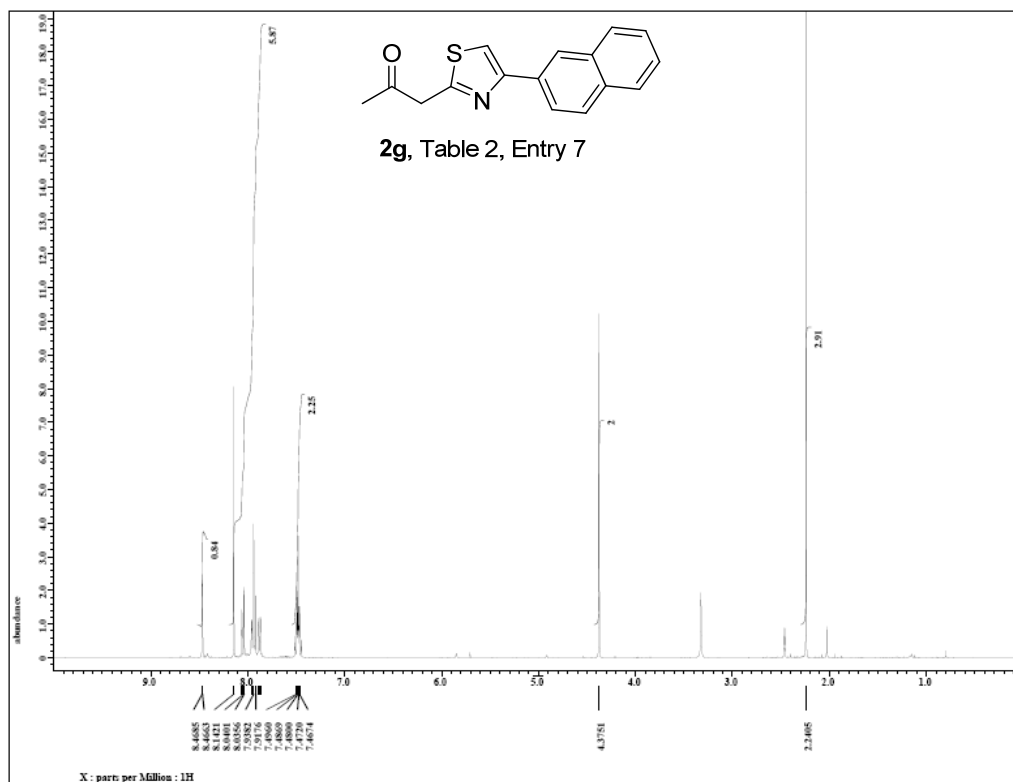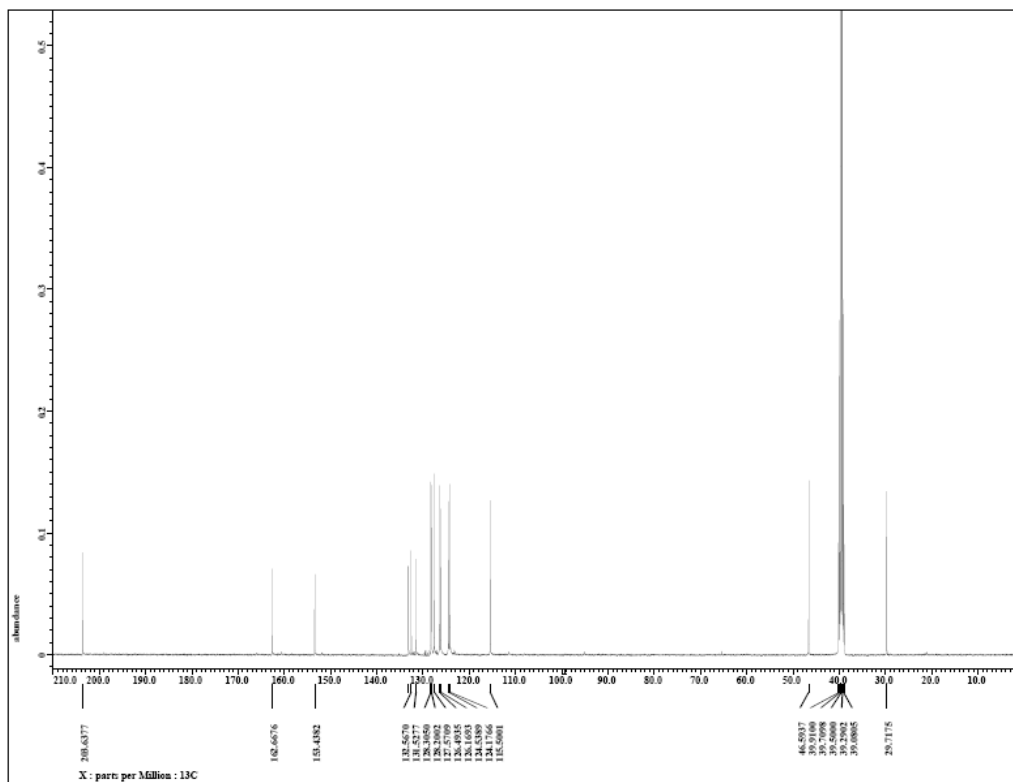

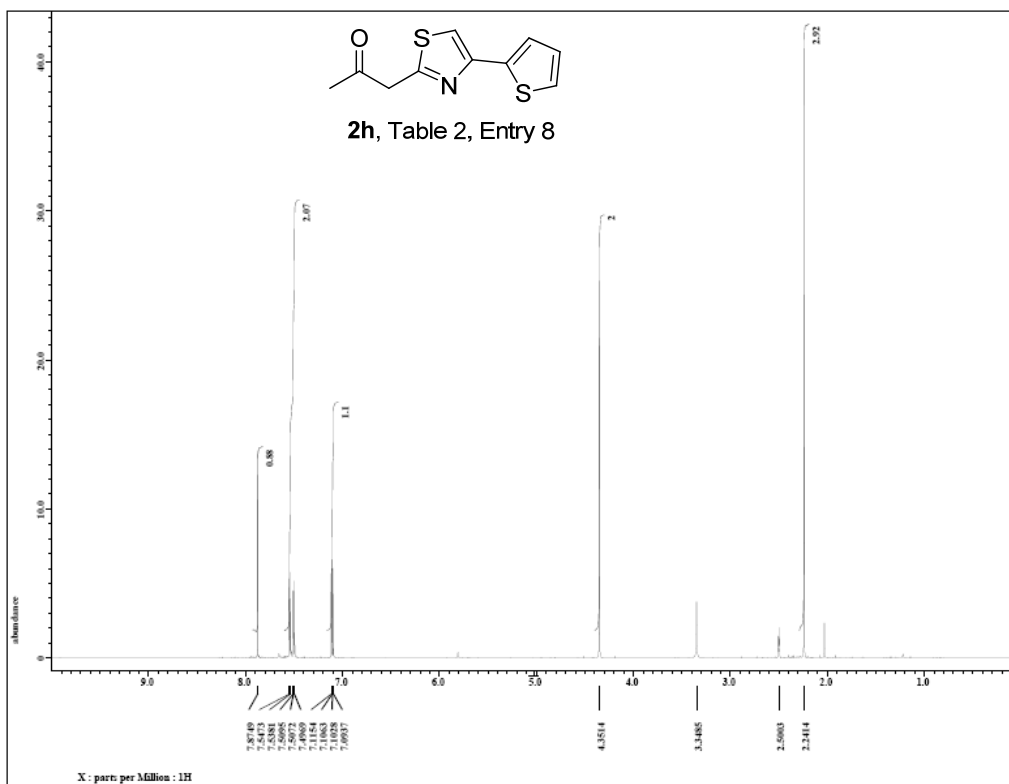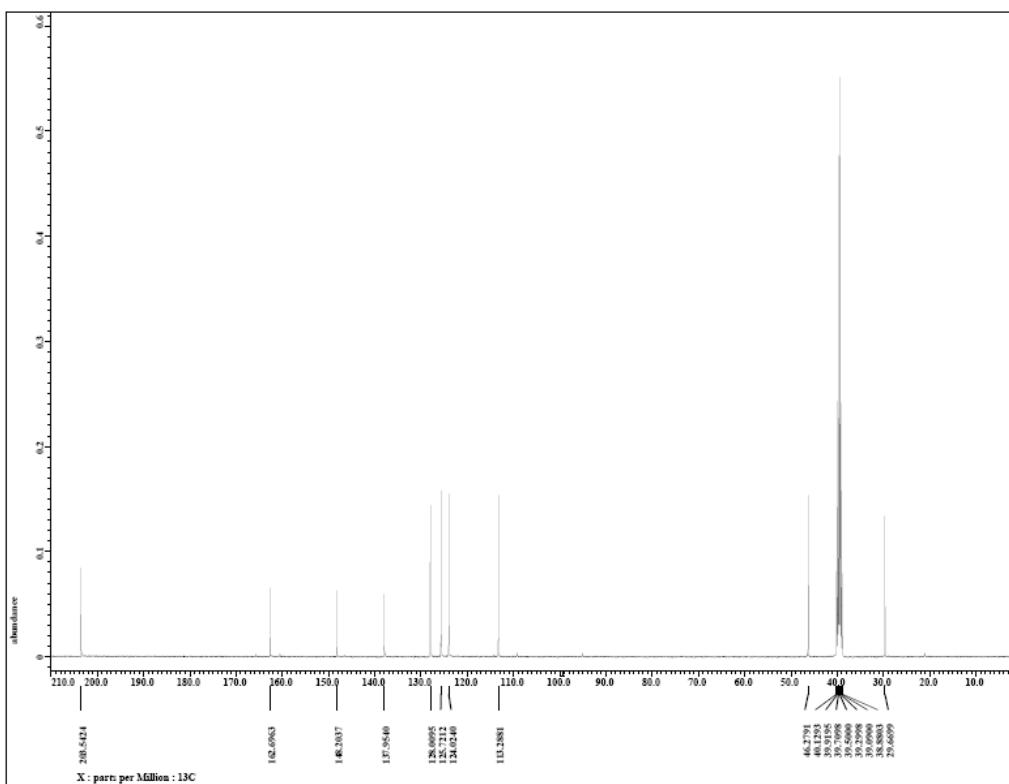

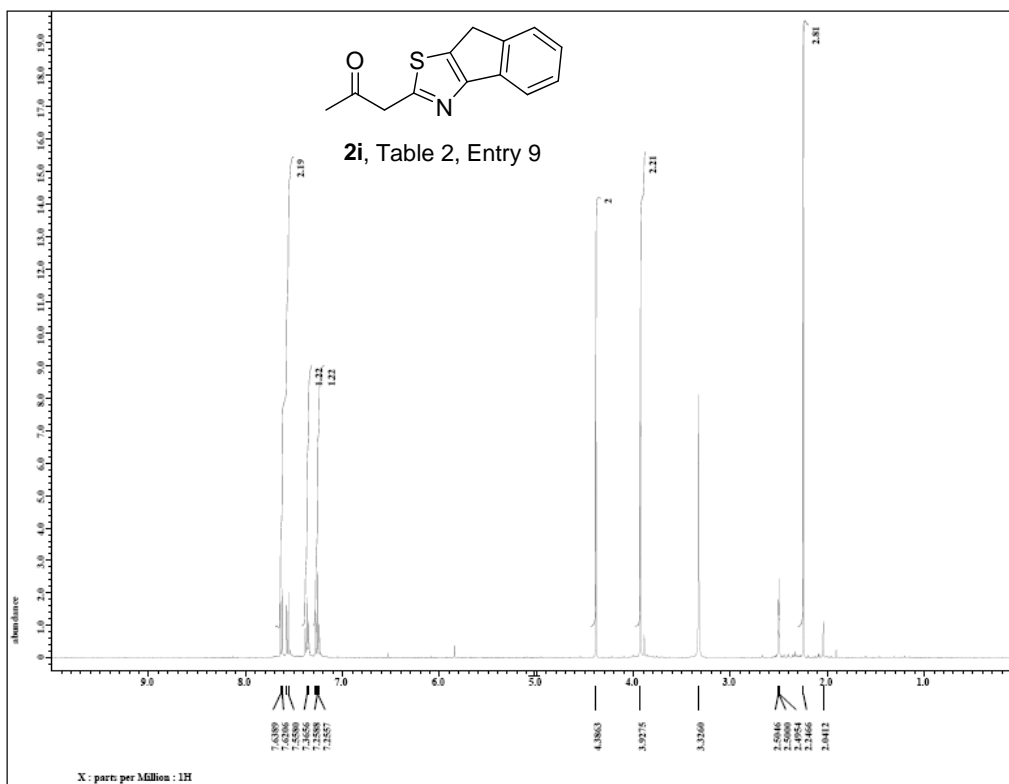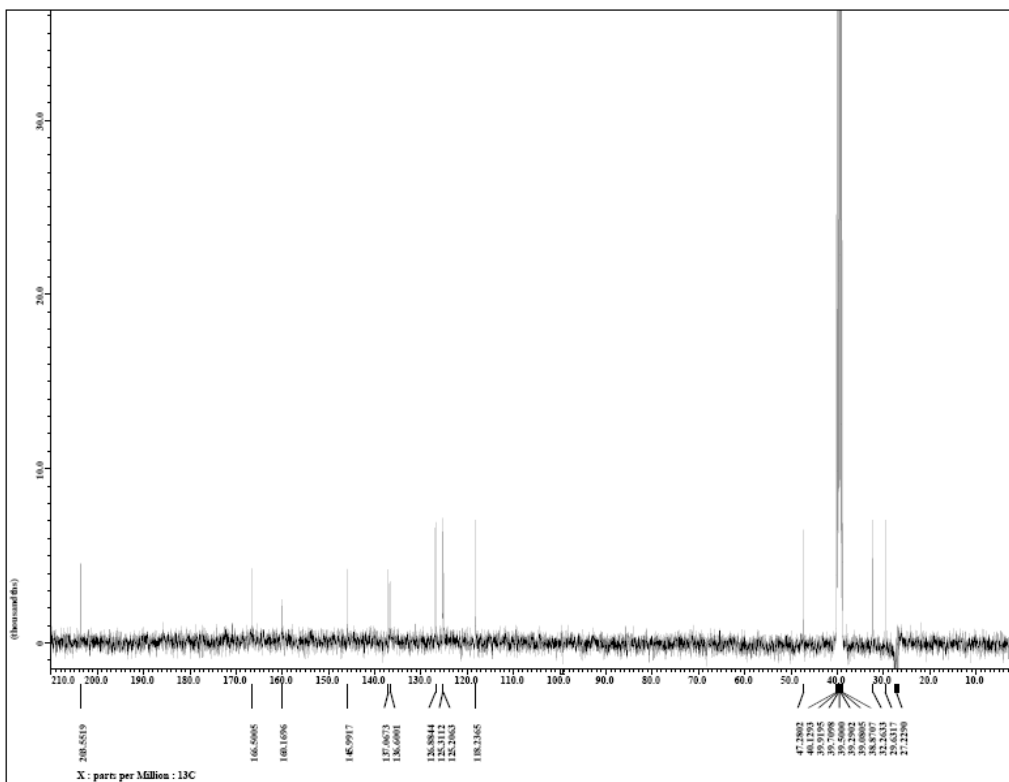

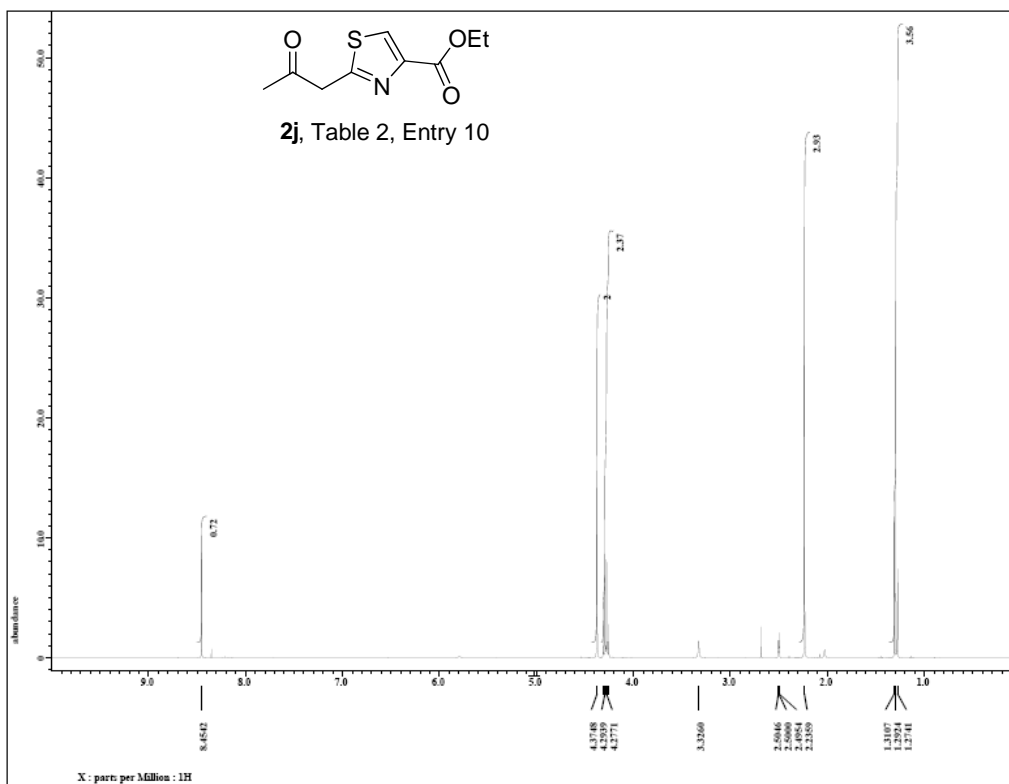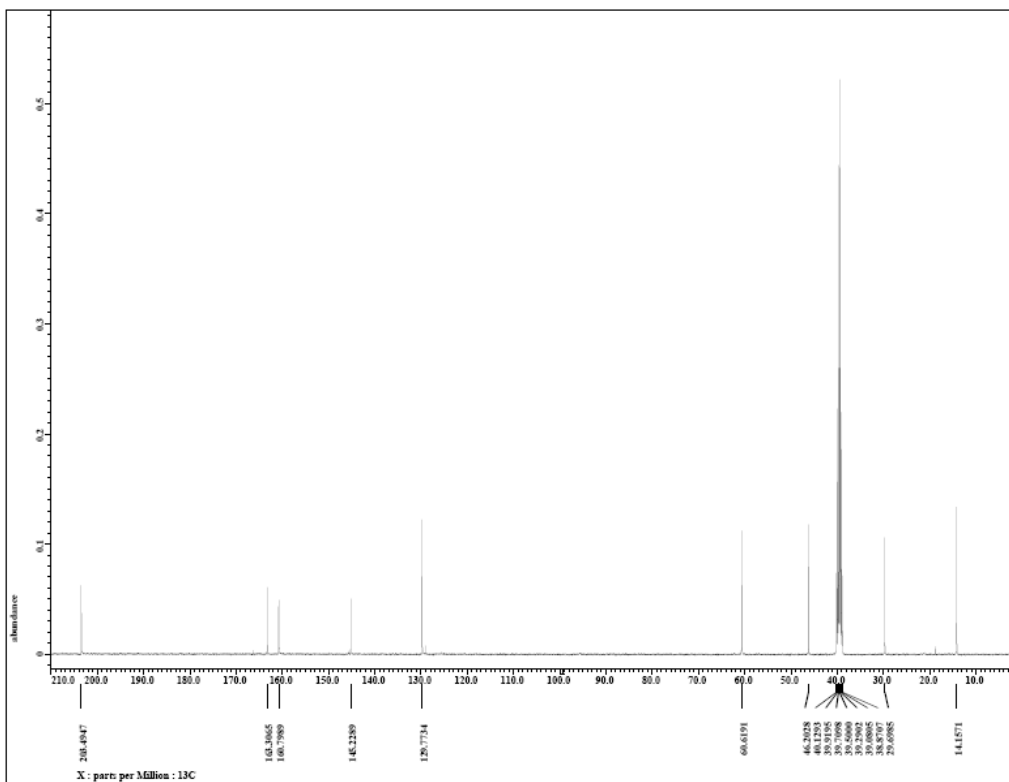

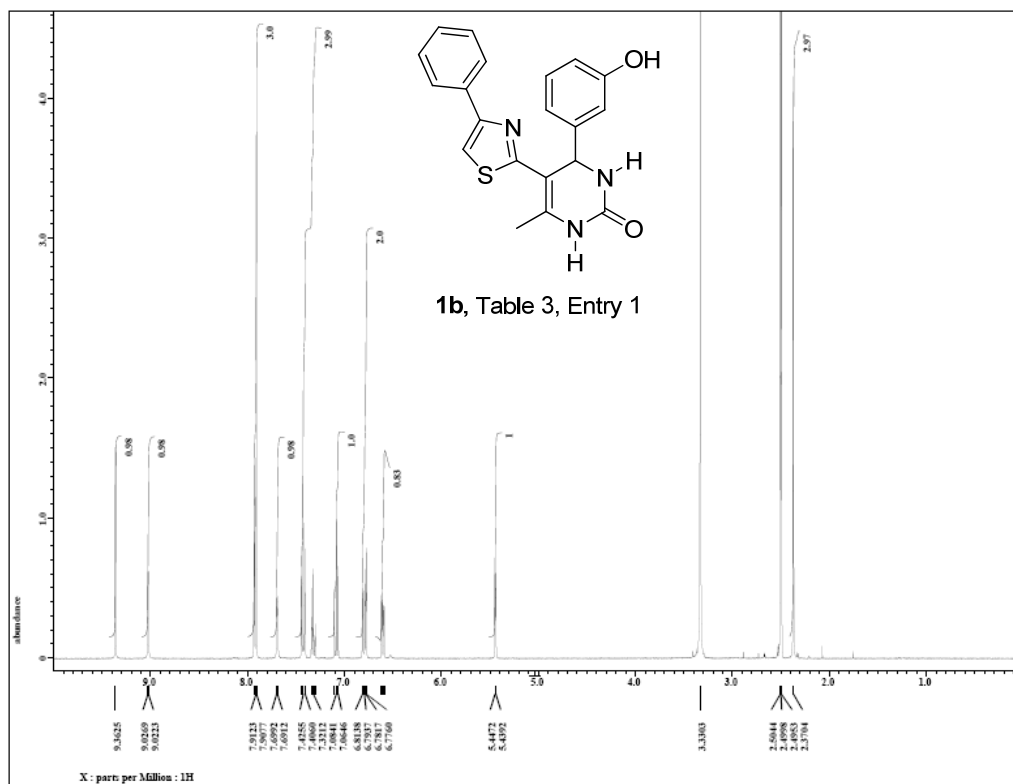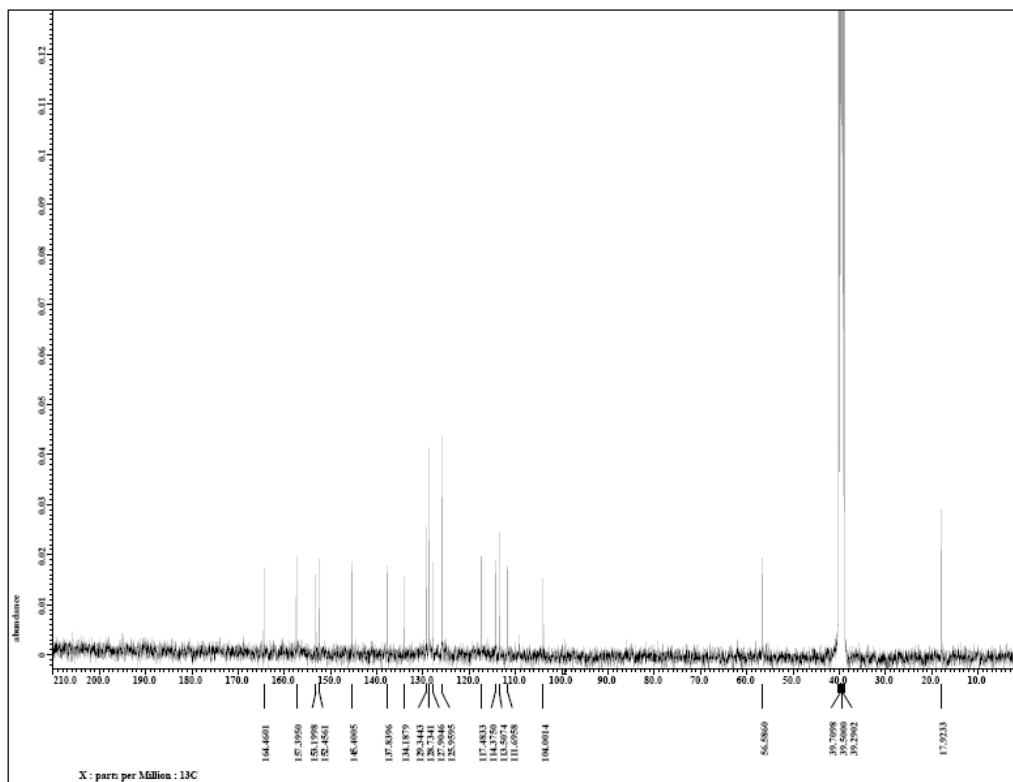

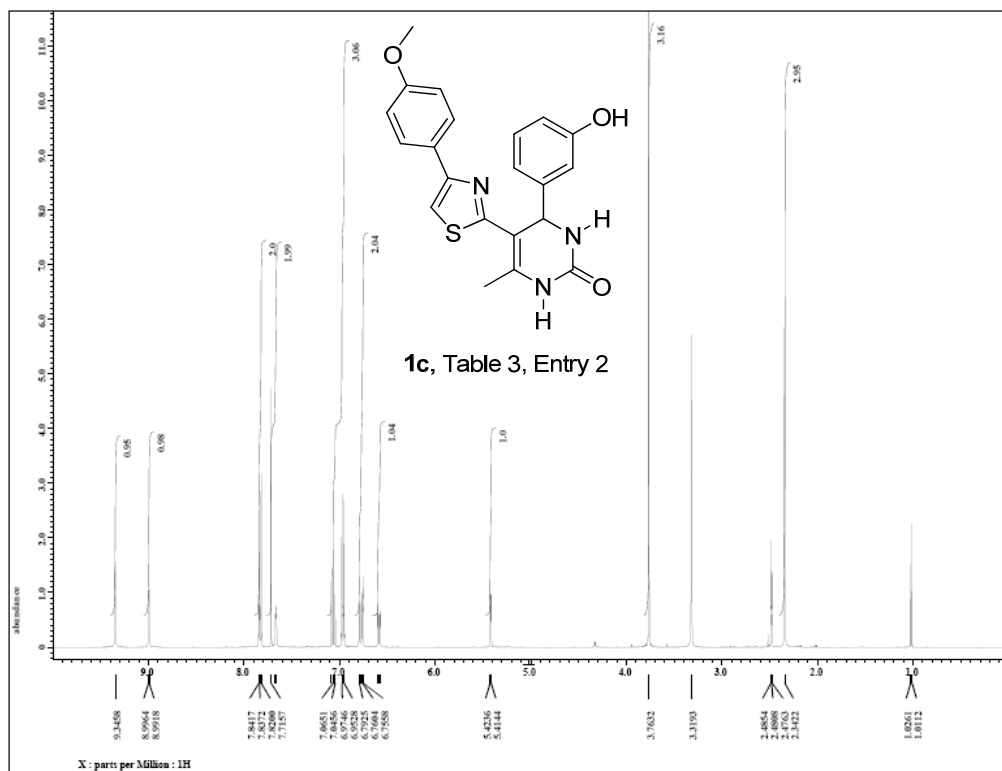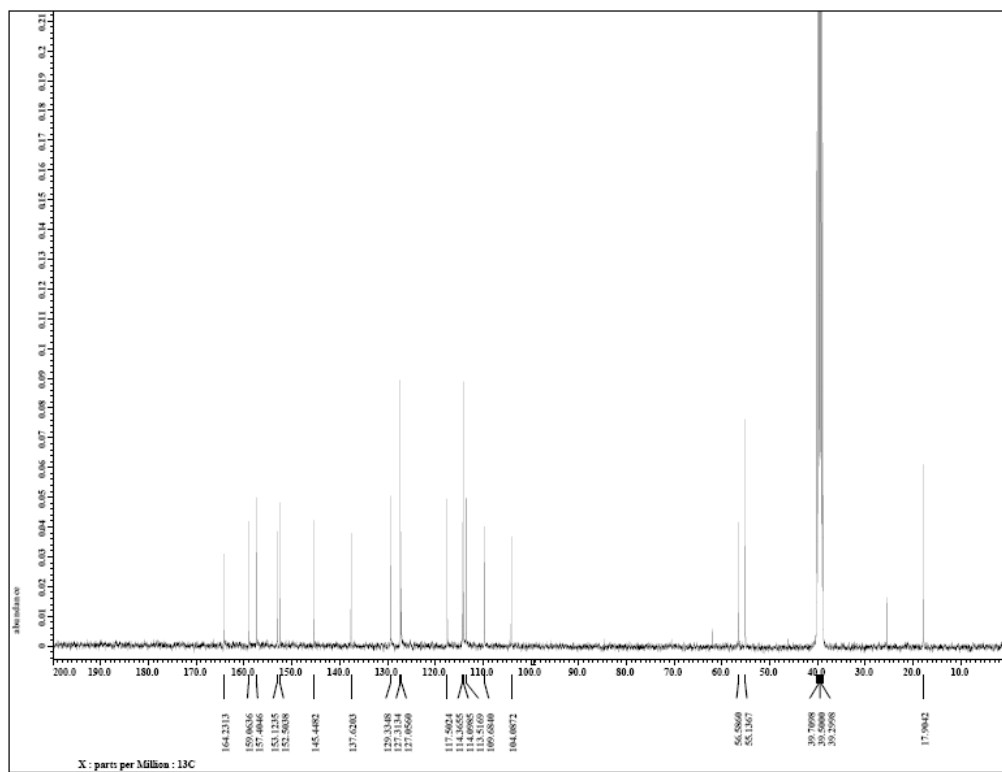



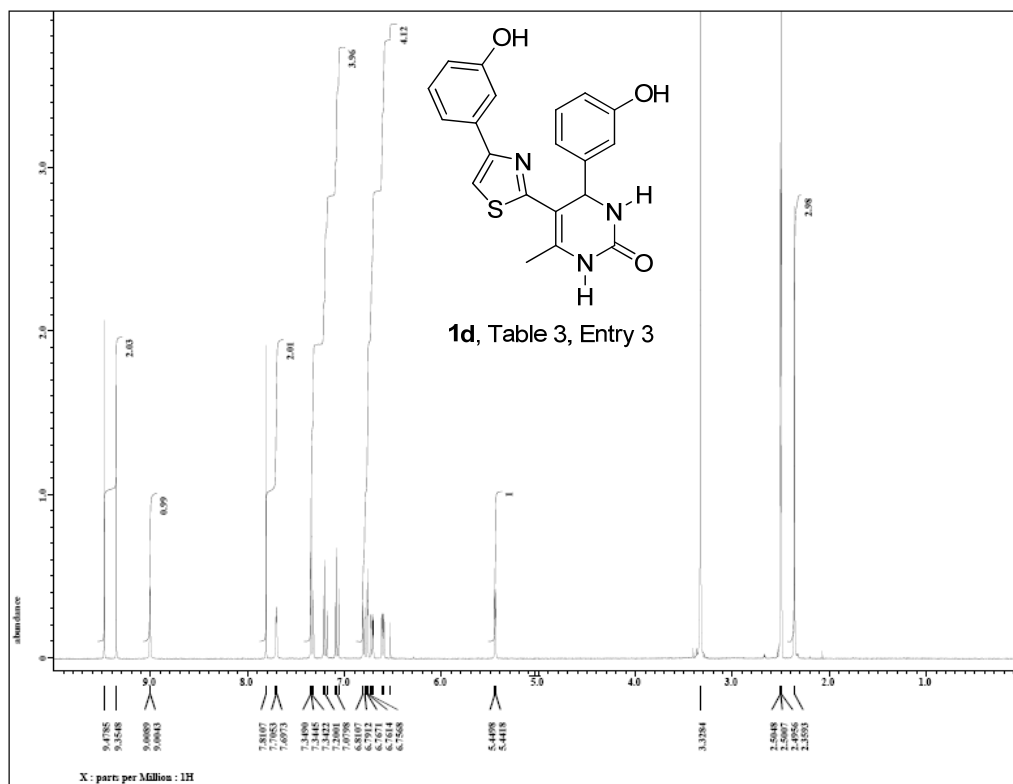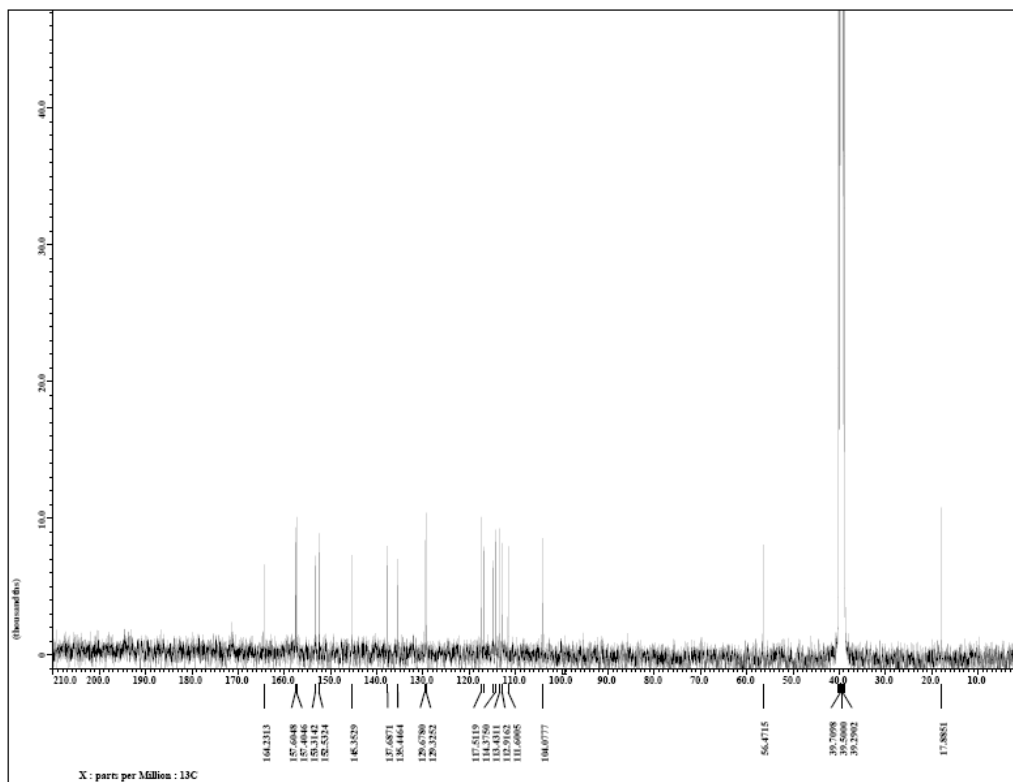

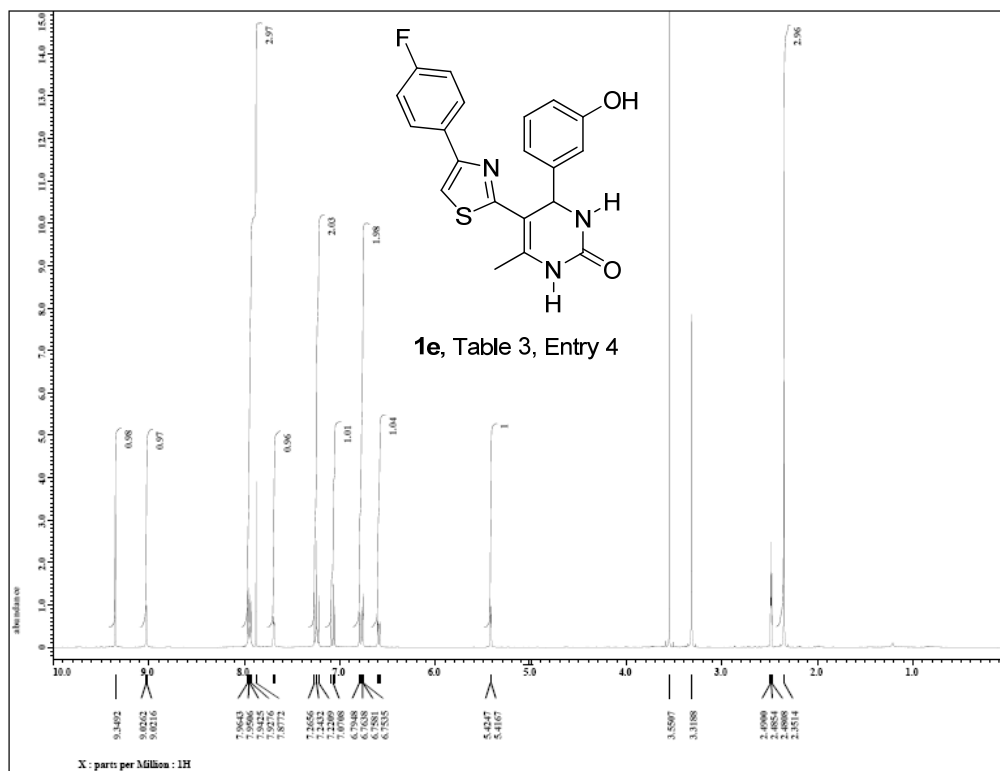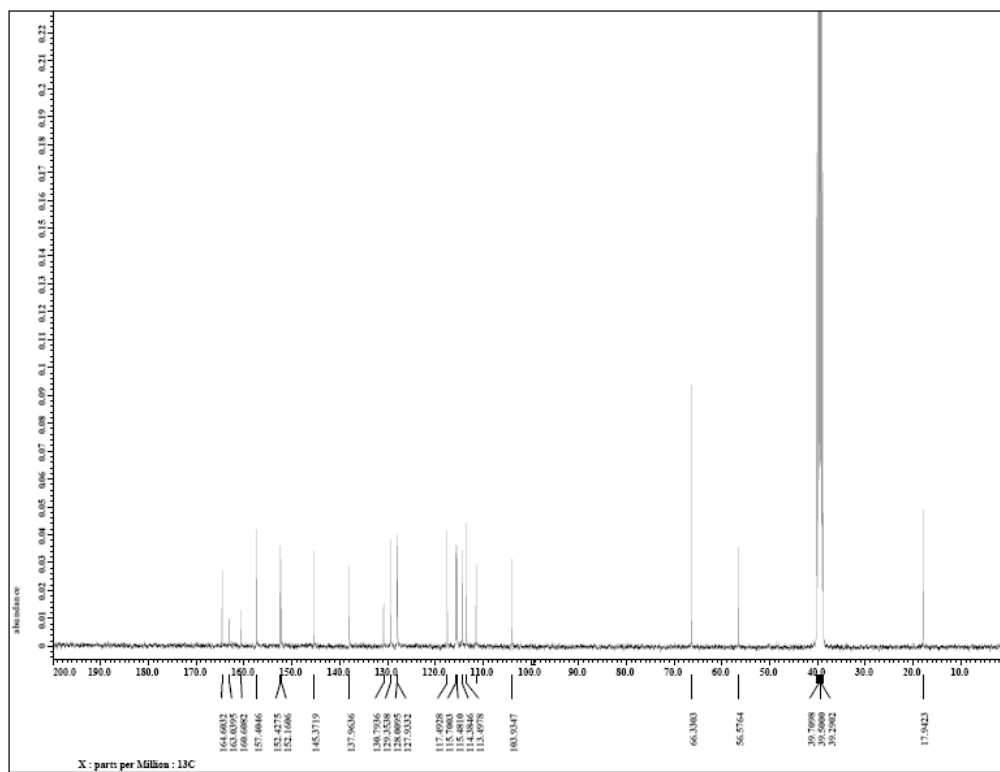

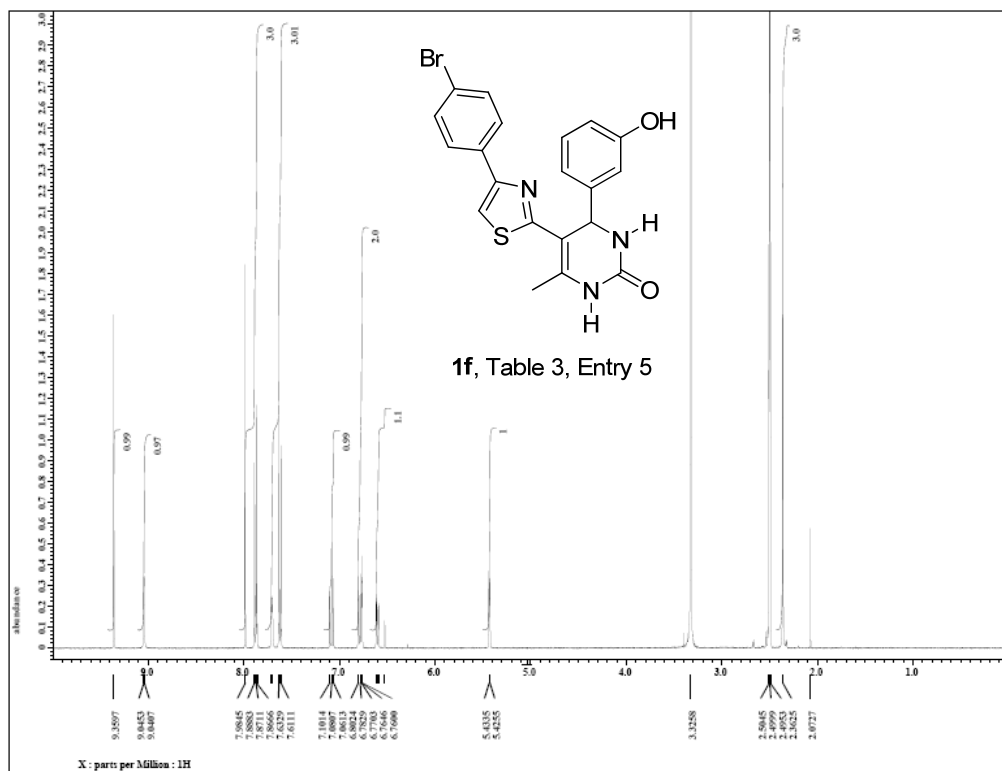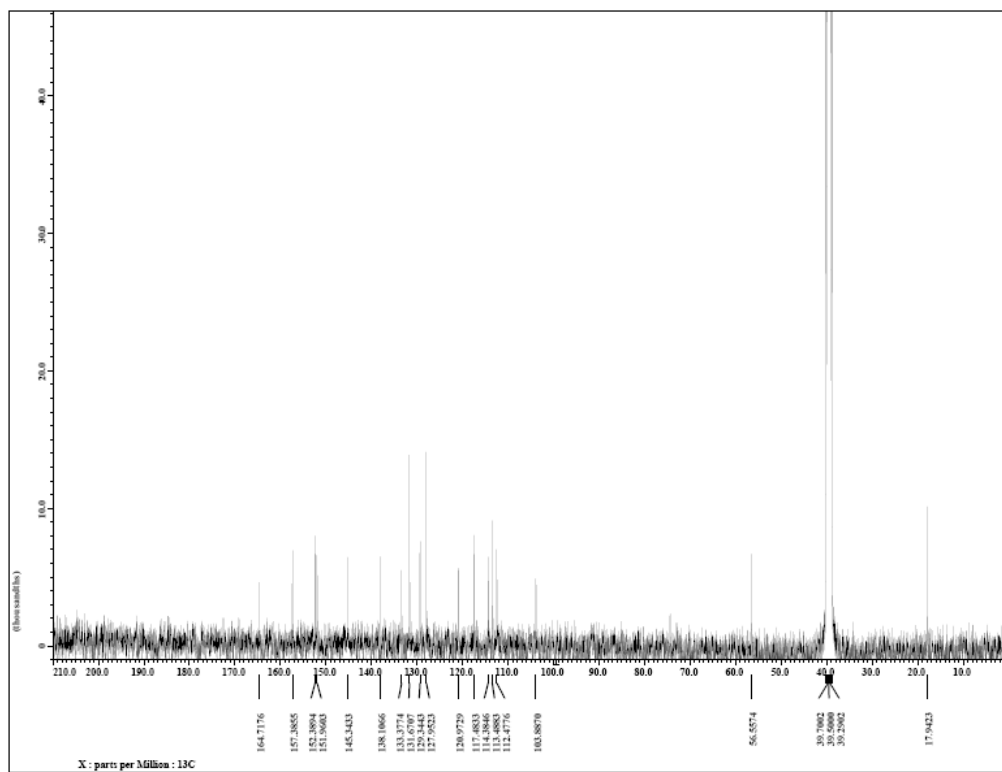

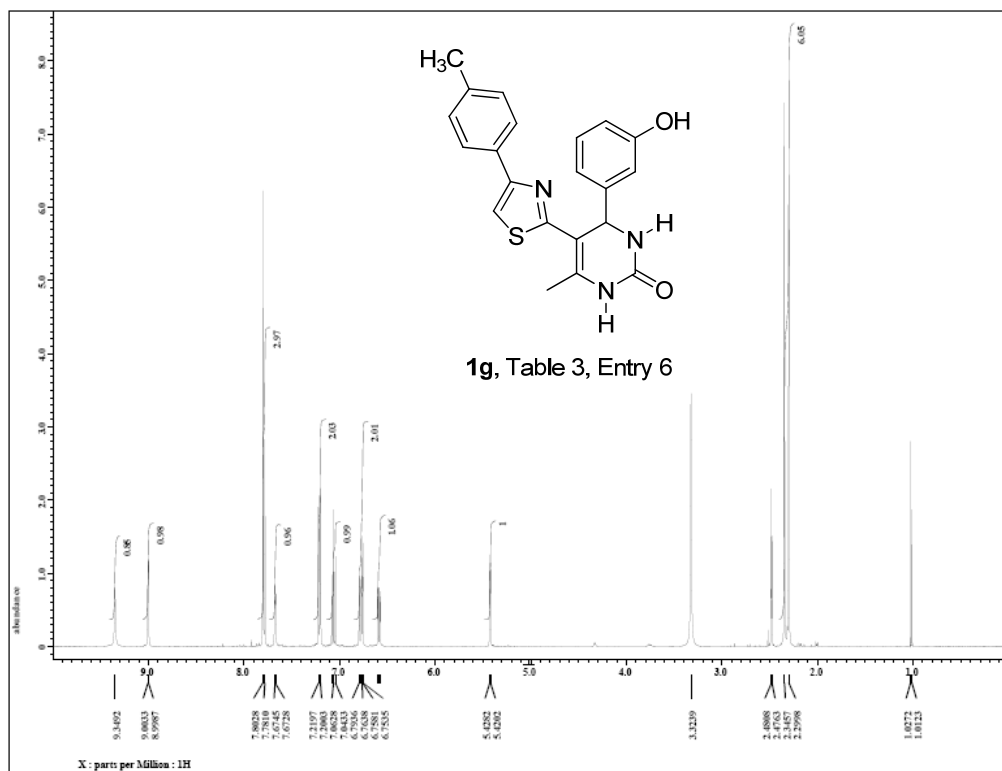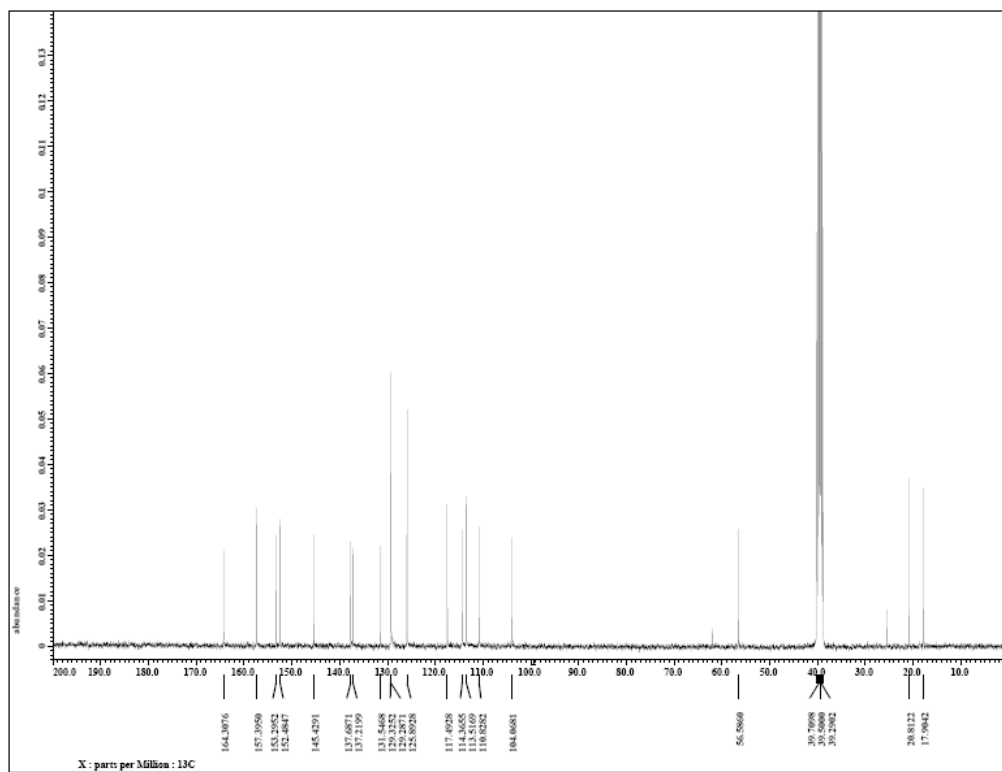

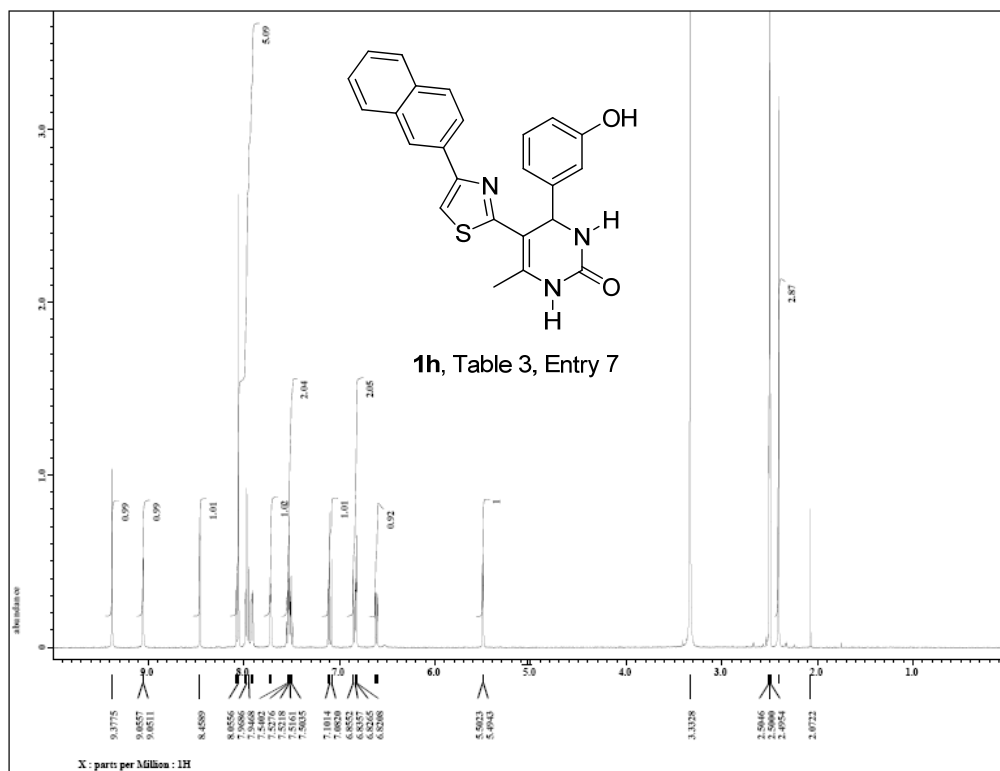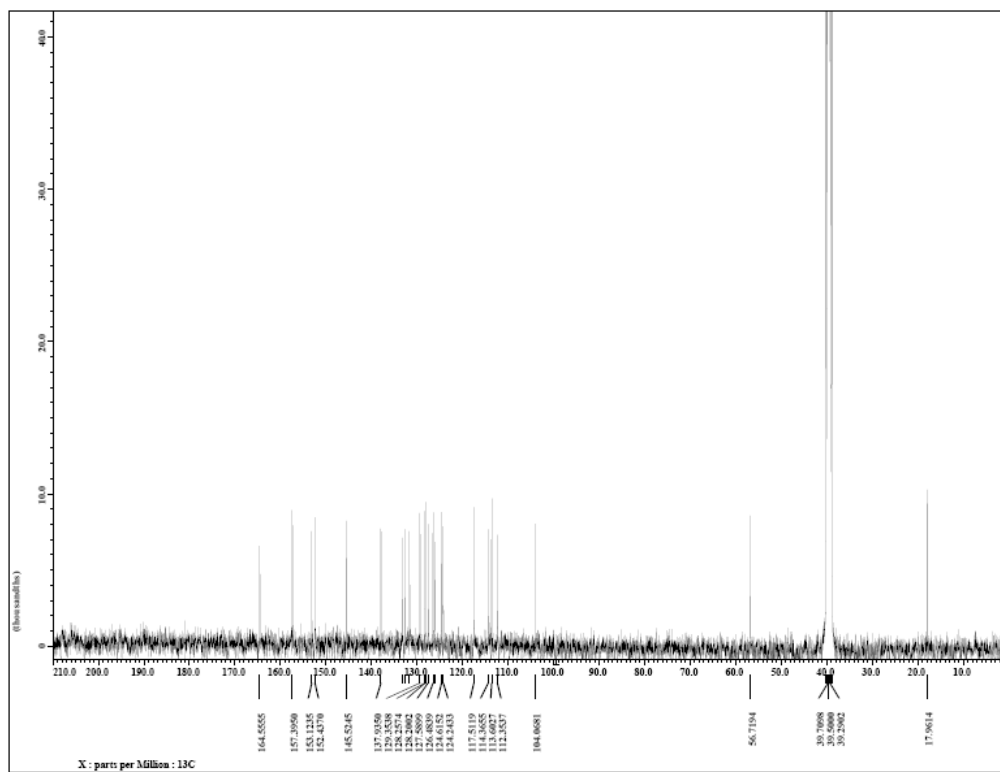

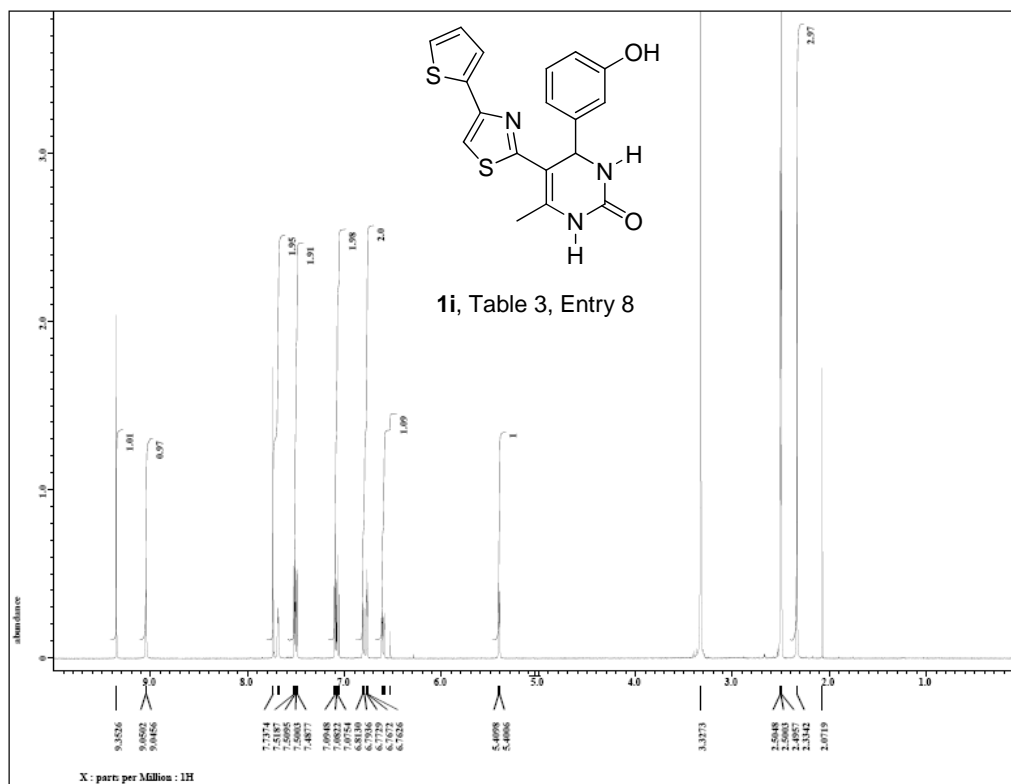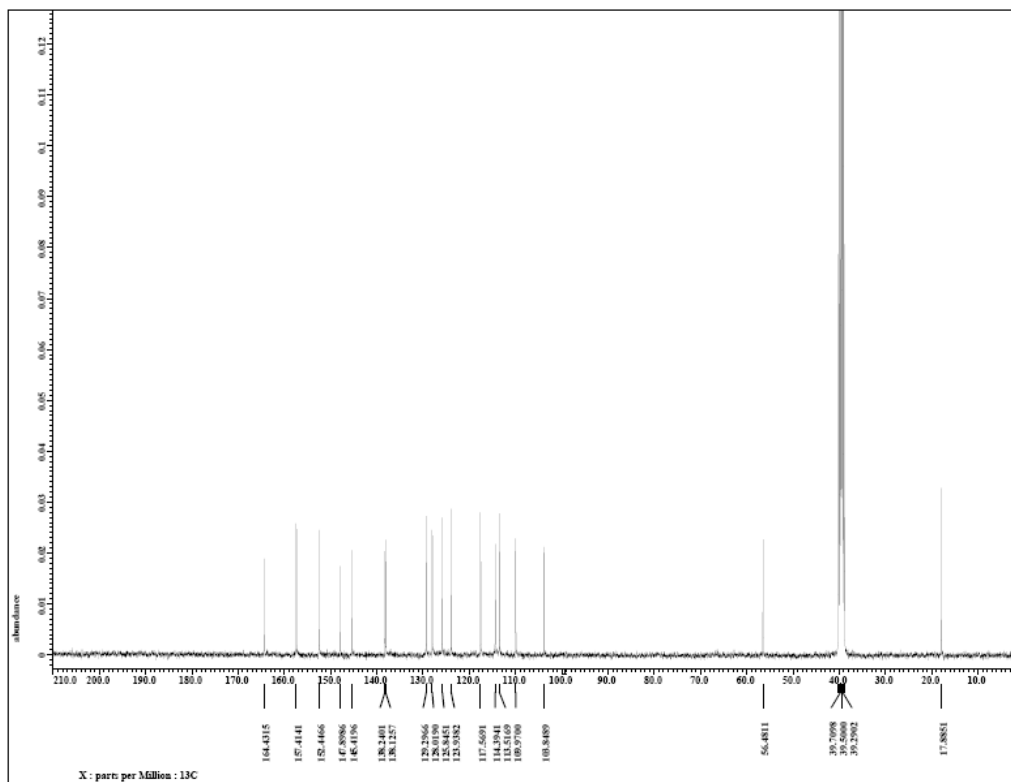

Supplement: NIHMS575084-supplement-Supplemental_Data.pdf [file NIHMS575084-supplement-Supplemental_Data.pdf]
